## SHAPING BRAIN STRUCTURE: GENETIC AND PHYLOGENETIC AXES OF MACRO SCALE ORGANIZATION OF CORTICAL THICKNESS

Sofie L. Valk<sup>1,2\*</sup>, Ting Xu<sup>3</sup>, Daniel S. Margulies<sup>4</sup>, Shahrzad Kahrabian Masouleh<sup>1,2</sup>, Casey Paquola<sup>5</sup>, Alexandros Goulas<sup>6</sup>, Peter Kochunov<sup>7</sup>, Jonathan Smallwood<sup>8</sup>, B.T. Thomas Yeo<sup>9-11</sup>, Boris C. Bernhardt<sup>5</sup>, Simon B. Eickhoff<sup>1,2</sup>

<sup>1</sup>) *Institute of Neuroscience and Medicine (INM-7: Brain and Behaviour), Research Centre Jülich, 52425 Jülich, Germany;* <sup>2</sup>) *Institute of Systems Neuroscience, Heinrich Heine University Düsseldorf, 40225 Düsseldorf, Germany;* <sup>3</sup>) *From the Center for the Developing Brain, Child-Mind Institute, New York, USA;* <sup>4</sup>) *Centre National de la Recherche Scientifique, UMR 7225, Frontlab, Institut du Cerveau et de la Moelle Épinière, Paris, France;* <sup>5</sup>) *McConnell Brain Imaging Centre, Montreal Neurological Institute and Hospital, McGill University, Montreal, Canada;* <sup>6</sup>) *Institute of Computational Neuroscience, University Medical Center Hamburg-Eppendorf, Hamburg University, Hamburg, Germany;* <sup>7</sup>) *Maryland Psychiatric Research Center, University of Maryland School of Medicine, Baltimore, Maryland, US;* <sup>8</sup>) *York Neuroimaging Center, University of York, York, United Kingdom;* <sup>9</sup>) *Department of Electrical and Computer Engineering, Centre for Sleep and Cognition, Clinical Imaging Research Centre and N.I Institute for Health and Memory Networks Program, National University of Singapore, Singapore, Singapore;* <sup>10</sup>) *Athinoula A. Martinos Center for Biomedical Imaging, Massachusetts General Hospital, Charlestown, MA, USA;* <sup>11</sup>) *NUS Graduate School for Integrative Sciences and Engineering, National University of Singapore, Singapore, Singapore.*

\* Correspondence to [s.valk@fz-juelich.de](mailto:s.valk@fz-juelich.de)

2 *Abstract*

3 Structural and functional characteristics of the cortex systematically vary along global axes as  
4 a function of cytoarchitecture, gene expression, and connectivity. The topology of the cerebral  
5 cortex has been proposed to be a prerequisite for the emergence of human cognition and  
6 explain both the impact and progression of pathology. However, the neurogenetic origin of  
7 these organizational axes in humans remains incompletely understood. To address this gap in  
8 the literature our current study assessed macro scale cortical organization through an  
9 unsupervised machine learning analysis of cortical thickness covariance patterns and used  
10 converging methods to evaluate its genetic basis. In a large-scale sample of twins (n=899) we  
11 found structural covariance of thickness to be organized along both an anterior-to-posterior  
12 and inferior-to-superior axis. We found that both axes showed a high degree of  
13 correspondence in pairs of identical twins, suggesting a strong heritable component in  
14 humans. Furthermore, comparing these dimensions in macaques and humans highlighted  
15 similar organizational principles in both species demonstrating that these axes of cortical  
16 organization are phylogenetically conserved within primate species. Finally, we found that in  
17 both humans and macaques the inferior-superior dimension of cortical organization was  
18 aligned with the predictions of the dual-origin theory, highlighting the possibility that the  
19 macroscale organization of primate brain structure is subject to multiple distinct  
20 neurodevelopmental trajectories. Together, our study establishes the genetic basis of natural  
21 axes in the cerebral cortex along which structure is organized and so provides important  
22 insights into the organization of human cognition that will inform both our understanding of  
23 how structure guides function and for the progression of pathology in diseases.

24

25

26

## Shaping Brain Structure

### 27 **Introduction**

28 A fundamental question in neuroscience is how the structure of the cortex constrains its  
29 function. Over the course of almost a century, numerous studies have shown that the cerebral  
30 cortex is organized along dimensions that reflect systematic variations in features of brain  
31 structure and function such as laminar differentiation, gene expression, structural and  
32 functional connectivity<sup>1-15</sup>. These dimensions have been suggested to reflect the timing of  
33 neurogenesis and may relate to the neurogenetic origin of cortical organization<sup>3,16</sup>. A  
34 potential mechanism for the source of neurogenetic differentiation of brain regions is  
35 described by the dual origin theory<sup>3,17-21</sup>. This theory conceptualizes cortical areas as  
36 emerging from waves of laminar differentiation that spring from the piriform cortex (paleo-  
37 cortex) and the hippocampus (archi-cortex). The dual structure might be rooted in  
38 heterochronous ontological axes in the developing cortex<sup>16</sup>.

39

40 The systematic topological organization of the cerebral cortex has been proposed to reflect an  
41 architecture which optimize the balance of externally and internally oriented functioning,  
42 which is critical for flexibility of human cognition<sup>22</sup>. For example, association cortex is  
43 located at maximal distance from regions of primary cortex that are functionally specialized  
44 for perceiving and acting in the here and now. This increased spatial distance from primary  
45 cortex may allow association cortex to take on functions that are only loosely constrained by  
46 the immediate environment, allowing internal representations to contribute to cognition and  
47 so enhancing the flexibility, and evolutionary fitness of behavior<sup>22-26</sup>. Accordingly,  
48 understanding how the structure of the cortex scaffolds function in a flexible manner requires  
49 understanding how macroscale structural features of the organization of the human cortex  
50 emerge. Moreover, previous work has implicated macroscale organizational axes of structure  
51 and function in the impact and progression of pathology. For example, Parkinson's and  
52 Alzheimer's disease have been proposed to follow a trajectory, in which underlying

## Shaping Brain Structure

53 anatomical axes determine the sequence in which specific regions and networks are  
54 progressively impacted at different disease stages<sup>27,28</sup>. Recently, we have been able to show  
55 that functional abnormalities in autism spectrum disorder relate to systematic disruptions in  
56 large-scale organization of brain function, providing a parsimonious reference frame in which  
57 the heterogeneous symptoms of autism spectrum disorder can be understood<sup>29</sup>.

58

59 Although the importance of macroscale axes of cortical organization in cognition and  
60 pathology are now recognized, the degree to which these topological features of the cerebral  
61 cortex are genetically determined remains incompletely understood. Measured across a  
62 population, local brain structure shows marked patterns of covariation across the cerebral  
63 cortex, termed ‘structural covariance’. These macro scale patterns in cortical thickness have  
64 been linked to both structural and functional connectivity<sup>30,31</sup> and twin studies have shown  
65 that thickness covariance between regions is largely due to additive genetic effects<sup>32,33</sup>.  
66 Recent work shows that inter-regional genetic correlation is determined by two organizational  
67 principles: (1) regions are strongly genetically correlated with their counterparts in the  
68 opposite cerebral hemisphere<sup>34,35</sup> and (2) regions are highly genetically correlated with  
69 geometrically nearby regions<sup>35</sup>. The local processes that govern the observed distribution of  
70 cortical thickness are reasonably well understood. For example, associations between  
71 structural and functional connectivity may arise due to shared trophic changes at the synaptic  
72 and cellular levels<sup>36,37</sup> and/or reflect coupled expression of genes enriched in supra-granular  
73 layers<sup>38</sup> that are associated with transcriptomic similarity of local brain regions<sup>39</sup>. Importantly  
74 both of these effects converge with postmortem inter-regional correlations of gene expression  
75<sup>40</sup>. Developmentally, macro scale patterns of cortical thickness mature with age, possibly  
76 because of synchronized neurodevelopment<sup>36,37</sup> and the expression of common genetic cues  
77 during early cortical development<sup>41</sup>.

78

## Shaping Brain Structure

79 Taken together contemporary theory suggests that (a) macro scale patterns of cortical  
80 structure make an important contribution to human cognition and (b) that this is supported by  
81 common genetic influences in local areas of cortex. However, we currently lack a clear  
82 understanding of how genetic influences contribute to the fundamental organizational  
83 principles that underpin the macro scale patterns of cortical thickness seen in humans. Our  
84 current study sought to directly examine how genetic influences contribute to the spatial  
85 organization of macro scale features of the cortex. We used advanced machine learning  
86 methods to construct large-scale organizational gradients that underpin the structural  
87 covariance across the cortex. In contrast to clustering-based decompositions of the brain into  
88 discrete communities<sup>42</sup>, cortex-wide gradient mapping techniques describe neural structure  
89 and function in a low dimensional space, or, coordinate system, that reflects the macro scale  
90 patterns that underpin the observed neural data. We used this approach to describe the  
91 structural covariance in humans as well as in non-human primates, and to evaluate whether  
92 these dimensions of variation are genetically determined. In particular, we used a twin-  
93 design based on the Human Connectome Young Adult sample (S900) using Sequential  
94 Oligogenic Linkage Analysis Routines ([www.solar-eclipse-genetics.org](http://www.solar-eclipse-genetics.org); Solar Eclipse 8.4.0.)  
95 to evaluate genetic correlation of local cortical thickness across the cortical mantle. In a  
96 second analysis we evaluated the phylogenetic basis of macros scale patterns of structural  
97 covariance by comparing the large-scale gradients in macaque monkeys (PRIME-DE)<sup>43</sup> with  
98 those seen in humans. Last, we compared the axes of macro scale organization of cortical  
99 thickness in humans and macaques with organizational axes expected based on the theory of  
100 dual origin<sup>3,17-20</sup>.

101

102 Foreshadowing our results, both analyses found evidence that the two main organizational  
103 patterns that describe macro scale patterns of cortical thickness were driven by genetic  
104 factors. Using a pedigree model to evaluate the genetic correlation of thickness in humans, we

## Shaping Brain Structure

105 found that macro scale patterns of cortical thickness covariance were highly influenced by  
106 genetics, especially in prefrontal cortex, highlighting the role of genetics in shaping brain  
107 structure in regions functionally associated with complex features of human cognition. We  
108 also observed a similar macro scale organization of cortical thickness in humans and  
109 macaques, suggesting that these axes are phylogenetically conserved in primates. Moreover,  
110 we found an inverse relationship between archi-cortex (hippocampus) and paleo-cortex  
111 (olfactory cortex) distance and the inferior-to-superior organization gradient in humans and  
112 macaques, aligning covariance topology with the dual origin theory. Together these analyses  
113 highlight the important role that genetic processes play in determining the large-scale  
114 organization of cortical structure, and so provide an important window into the innate  
115 architecture supporting human cognition and a potential model for impact and progression of  
116 pathology.

## Shaping Brain Structure

### 117 **Results**

118 *Posterior-anterior and inferior-superior axes underlie macro scale organization of cortical*  
119 *thickness*

120 We started our analysis by evaluating the topological organization of structural covariance  
121 (**Figure 1**). We used the mean thickness within 400 parcels<sup>44</sup> to create group-level covariance  
122 maps based on individual thickness values of participants from the Human Connectome  
123 Project (HCP, S900). When computing the macro scale organization of cortical thickness, we  
124 controlled for the effects of age, sex, and global thickness. First, we evaluated the average  
125 structural covariance as a function of brain network organization<sup>42</sup>. Strength of structural  
126 covariance was stronger between regions within the same functional community than between  
127 networks (**Figure 1B; Supplementary Table 1**).

128

129 We then implemented diffusion map embedding, a method previously used in function  
130 connectivity as well as microstructural covariance networks. Diffusion map embedding  
131 allows local and long-distance connections to be projected into a common space<sup>13,45</sup>. The  
132 resulting components are unitless and identify the position of nodes along the respective  
133 embedding axis that encodes the dominant differences in nodes' connectivity patterns. The  
134 principal gradient in structural covariance followed a posterior-anterior trajectory from  
135 occipital regions to the frontal cortex and accounted for 17% of the variance in the thickness  
136 covariance data. Next, we examined the covariance values as a function of the structural  
137 gradient. We divided the structural gradient into 10 equally sized bins and plotted the average  
138 values of each structural gradient in each bin. We observed that the principal structural  
139 covariance gradient followed a U-shaped pattern with both extreme ends of the gradient  
140 showing strongest covariance and intermediate zones showing relative low covariance to  
141 regions in the same gradient level (**Figure 1C**). Topology of covariance showed a  
142 correspondence to functional organization, with unimodal regions exhibiting lower gradient

## Shaping Brain Structure

143 values relative to networks associated with higher-order processing (default mode network  
144 and frontoparietal network) (**Figure 1**).

145 The secondary gradient followed an inferior-superior pattern with endpoints in superior  
146 parietal lobe and lingual gyrus respectively and explained 13% of the observed variance.  
147 Plotting this gradient in each of the 10 bins according to their gradient values indicated that  
148 structural covariance increased along the inferior-superior axis, with highest covariance  
149 between regions located within superior parietal cortex. Findings were reproducible in a  
150 different dataset (eNKI, n=792, age 8-85yrs) (**Supplementary Figure 1**) and were observed  
151 using different preprocessing pipelines of thickness (CIVET and Freesurfer 6.0)  
152 (**Supplementary Figure 2, Supplementary Results**) and parcellation methods (Desikan-  
153 Killiany<sup>46</sup>, Glasser-atlas<sup>47</sup>, and Schaefer<sup>44</sup> 800 parcels, **Supplementary Figure 3**). Notably,  
154 age-related effects moderating structural covariance strength also followed posterior-anterior  
155 and inferior-superior axes (**Supplementary Figure 1, Supplementary Results**). The primary  
156 and secondary gradients, as well as gradients 3 and 4, showed comparable patterning  
157 bilaterally, while gradients 5 to 8 showed lateralization effects (**Supplementary Figure 4,**  
158 **Supplementary Results**). Follow up analysis indicated that the gradients of macro scale  
159 organization of cortical thickness existed above and beyond geodesic distance constraints, and  
160 aligned with previously reported gradients of functional connectivity and microstructural  
161 profile covariance (**Supplementary Results**). Conducting a meta-analysis using the  
162 Neurosynth database, we observed marked variation of function along both macro scale  
163 organizational gradients of thickness (**Supplementary Results**).

164

165



## Shaping Brain Structure

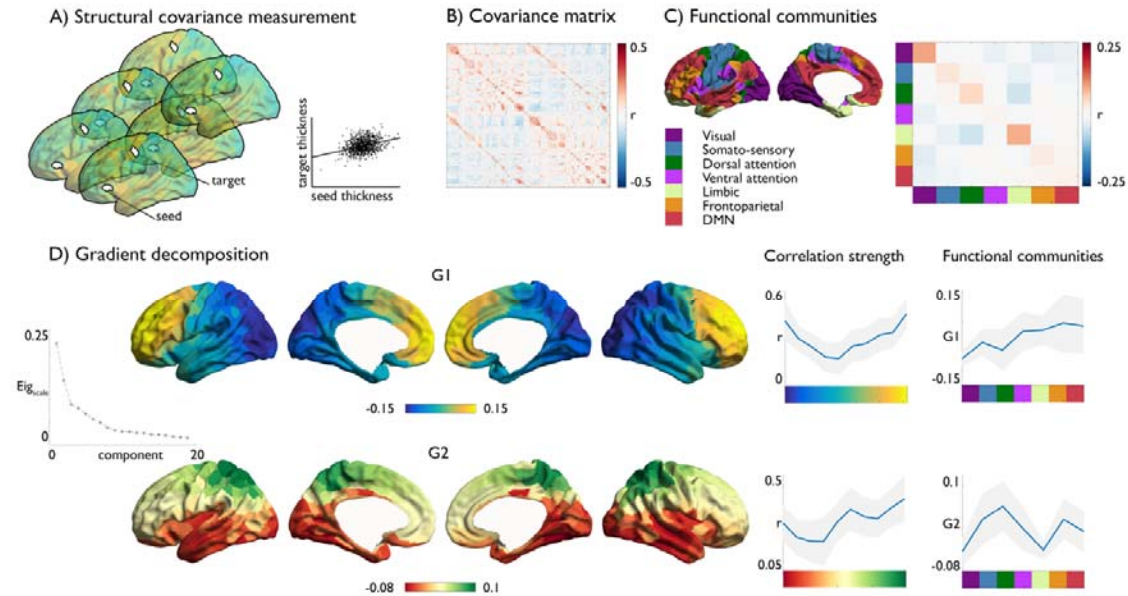

166  
167  
168  
169  
170  
171  
172  
173  
174

**Fig 1. Large scale organization of structural covariance.** A) Measuring structural covariance of thickness; B) Structural covariance matrix; C) mean correlation within functional network community<sup>42</sup>; D) Gradient decomposition, primary (G1) and secondary (G2) macro scale gradient, and their average value in mean covariance strength within binned gradient-level, indicating the covariance between regions at similar gradient level, and gradient values as a function of functional community (color nomenclature according to C).

### 175 *Macro scale organization of cortical thickness is genetically determined*

176 Having established macro scale organizational patterns of cortical thickness, we next  
177 computed the genetic correlation between the 400 cortical regions<sup>44</sup> in the HCP dataset.  
178 Genetic correlation is based on the decomposition of structural covariance in genetic and  
179 environmental factors using the genetic similarity between individuals to estimate shared  
180 additive genetic effects. Overall, 78±5% of the phenotypic correlation could be attributed to  
181 genetic factors and we observed high correlation between thickness covariance and genetic  
182 correlation of thickness ( $r=0.61$ ,  $p<0.0001$ ) and environmental correlation of thickness  
183 ( $r=0.33$ ,  $p<0.001$ ) across all nodes (**Supplementary Figure 5**). Patterns of genetic correlation  
184 were highest within, rather than between, functional communities (**Figure 2A**,  
185 **Supplementary Figure 5, Supplementary Table 2**). Though to a lesser extent, this was also  
186 the case for environmental influences (**Figure 2B, Supplementary Table 3**).

## Shaping Brain Structure

187 Performing whole-brain gradient decomposition on the genetic correlation maps, we observed  
188 almost identical large-scale gradients as in the structural covariance (Structural covariance G1  
189 versus genetic correlation G1:  $r=0.97$ , Structural covariance G2 versus genetic correlation  
190 G2: $r=0.95$ ). The primary genetic gradient explained 18% of the variance, traversing a  
191 posterior-anterior axis. Probing the within-gradient genetic correlation, we observed that both  
192 end points of the primary gradient showed highest genetic correlation to regions at the same  
193 level of the gradient, with the strongest genetic correlation observed in the frontal cortex  
194 (**Supplementary Figure 6, Supplementary Figure 7**). The secondary gradient explained  
195 14% of the variance, and, reflected a similar inferior-superior axis as was seen in the  
196 structural covariance gradients. Both organizational axes varied as a function of functional  
197 community, suggesting a relationship between the topological organization of genetic  
198 correlation of thickness and functional organization. Environmental correlations, explaining  
199 15% of variance of the thickness covariance, were organized along a rostral-caudal and  
200 inferior-superior axis as well, explaining 13% and 11% of the variance respectively  
201 (**Supplementary Figure 8**).

## Shaping Brain Structure

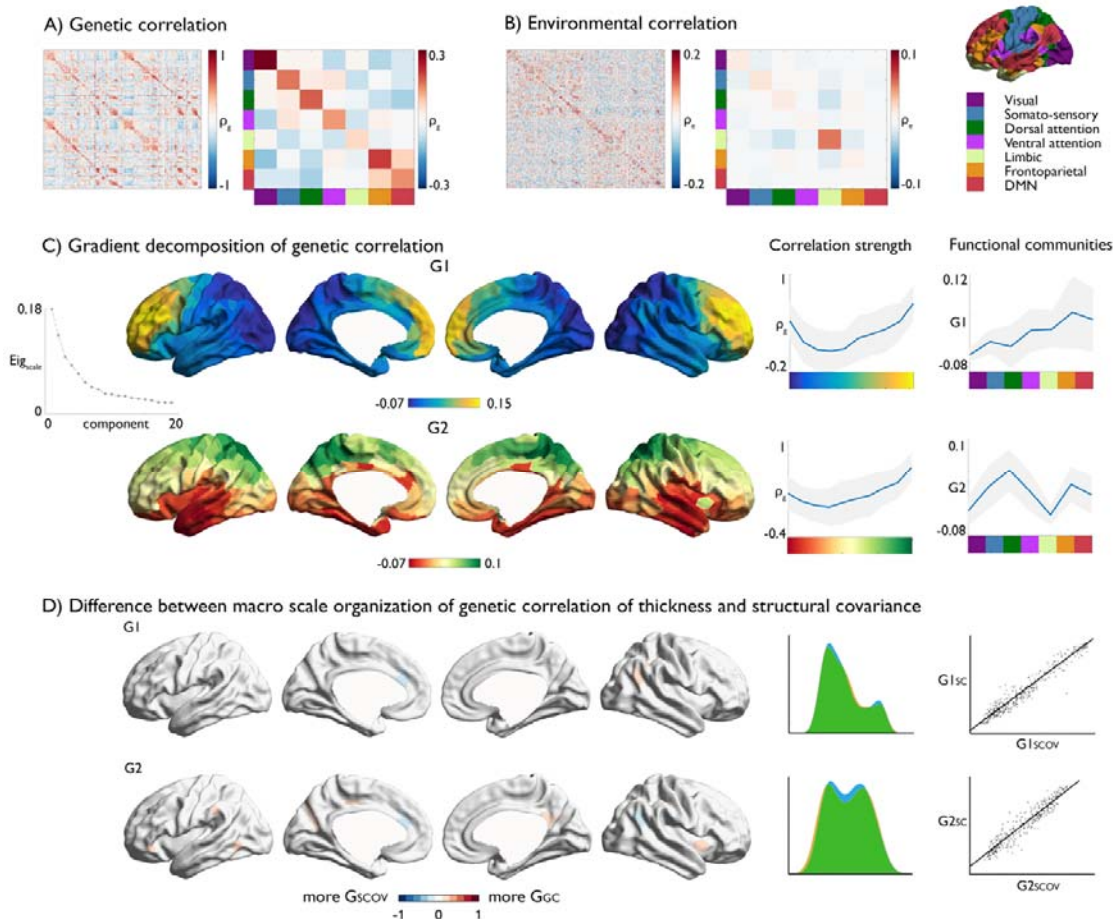

202

203 **Fig 2. Large scale organization of genetic correlation of cortical thickness.** A) Genetic  
 204 correlation of local cortical thickness; i) mean genetic correlation between functional  
 205 communities<sup>42</sup>; B) Environmental correlation of cortical thickness; i) mean environmental  
 206 correlation between functional communities<sup>42</sup>; C) Gradient decomposition, primary and  
 207 secondary macro scale gradient, and their average value in i). mean genetic correlation  
 208 strength within binned gradient-level; ii). functional communities; D). Parcel-wise difference  
 209 between the structural covariance gradients ( $G_{SCOV}$ ) and the genetic correlation gradients  
 210 ( $G_{GC}$ ). Blue indicates higher gradient ranking in  $G_{SCOV}$ , red indicates higher gradient ranking  
 211 in  $G_{GC}$ , as well as density plot and scatter of gradient values.

212

213 *Macro scale organization of cortical thickness in macaques.*

214 Thus far our analysis suggests that the macro scale organization of cortical structural  
 215 covariance in humans shows evidence of high degree of concordance amongst identical twins  
 216 suggesting a strong genetic influence. Our next analysis evaluated the genetic contribution to  
 217 macroscale dimensions of cortical structure by examining its phylogenetic stability. To  
 218 achieve this goal, we examined the topology of large-scale gradients in 41 macaque monkeys

## Shaping Brain Structure

219 from the PRIMatE Data Exchange (PRIME-DE)<sup>43</sup>. We created a structural covariance matrix  
220 based on cortical thickness of 41 macaques, using parcels based on the Markov atlas<sup>48</sup> and  
221 applied a similar analysis as for humans (see Methods). The principal and secondary gradient  
222 of the macaque monkey are presented in **Figure 3**. Similar to the gradients of structural  
223 covariance in humans, we observed that the topological organization of macaque monkey's  
224 structural covariance was also well described by both a posterior-anterior and inferior-  
225 superior component. In macaques the ordering of the components was reversed with the  
226 inferior-superior gradient explained 17% of the variance, whereas the posterior-anterior  
227 gradient explained 12% of the variance. The primary gradient stretched from inferior anterior  
228 temporal to sensory-motor cortex, and the secondary gradient stretched from sensory-motor to  
229 frontal cortex.

230

231 Last, using an innovative approach to perform cross species alignment (weighted functional-  
232 alignment)<sup>49</sup> we transformed human gradients to macaque cortex and compared them with  
233 the gradients in macaques directly. We observed strong similarity between the posterior-  
234 anterior gradient ( $r=0.52$ , [0.41, 0.61],  $p<0.0001$ ) and inferior-superior gradients in humans  
235 and macaques ( $r=0.60$ , [0.49, 0.70]),  $p<0.0001$ ). Notably, these similarities were stronger than  
236 between posterior-anterior gradient in humans and inferior-superior gradient in macaques ( $r=-$   
237  $0.08$ , [-0.23, 0.04],  $p=ns$ ) or inferior-superior gradient in humans and posterior-anterior  
238 gradient in macaques ( $r=0.24$ , [0.08, 0.37],  $p=0.001$ ).

## Shaping Brain Structure

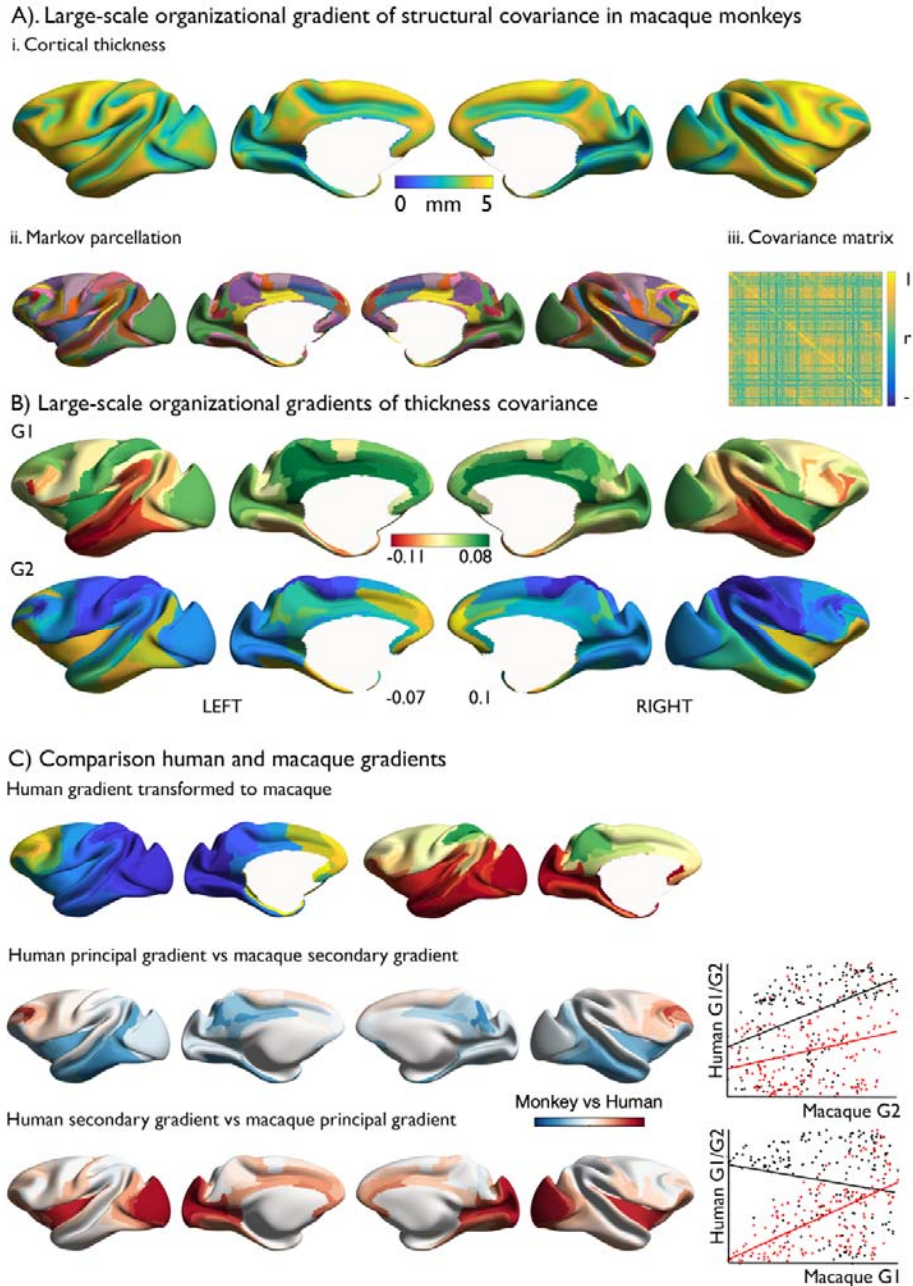

239  
240  
241  
242  
243  
244  
245  
246  
247  
248  
249  
250  
251  
252

**Fig. 3. Structural covariance gradient in macaque monkeys.** A) Mean cortical thickness in 41 macaques from three independent sites (Davis, Oxford, and Newcastle); ii. Markov parcellation<sup>48</sup>; iii. Structural covariance matrix controlling for site. B). Gradient decomposition: primary gradient (G1) and secondary gradient (G2); C). Comparison of human and macaque gradients. Red indicated a higher gradient ranking in humans, whereas blue indicates a higher gradient ranking in macaques. Scatter plots indicate the association between human posterior -anterior covariance gradient (G1, black) and human inferior-superior covariance (G2, red) and macaque principal gradient (G1, upper scatterplot) and secondary gradient (G2, lower scatterplot).

## Shaping Brain Structure

253 *Macro scale organization of cortical thickness and the theory of dual origin.*

254

255 Finally, we studied the genetic ontogeny of macro scale organization of cortical thickness in  
256 light of the dual origin theory of cortical development. This perspective assumes that cortical  
257 areas develop from waves of laminar differentiation that have their origin in either the  
258 piriform cortex (paleo-cortex) or the hippocampus (archi-cortex). The theory was established  
259 on histological investigations of the adult cortex of various reptiles and mammals<sup>3,17-20,50</sup>. We  
260 evaluated the previously reported gradients in humans and macaques with respect to the  
261 geodesic distance from the paleo-cortex (olfactory cortex) and the archi-cortex (hippocampus)  
262 (similar to previous work<sup>16</sup>).

263

264 In humans, the paleocortex was defined by the paleocortex, and the archi-cortex was defined  
265 by hippocampus, pre-subiculum, area 33', and retrosplenial complex. We computed the  
266 average geodesic distance from these ROIs (**Figure 4a**) and evaluated its association to the  
267 principal and secondary gradient of genetic correlation of thickness (based on **Figure 2**). We  
268 observed a dissociation between distance from paleo-cortex in inferior and superior  
269 proportions of the inferior-superior gradient (statistical energy-test<sup>51</sup>:  $p < 0.001$ ). And, using  
270 spin-tests to account for spatial autocorrelation<sup>52</sup>, we observed a negative relation between  
271 the paleo-cortex distance map and inferior-superior gradient level ( $r_{\text{spin}} = -0.78$ ,  $p < 0.01$ ),  
272 suggesting that the macro scale structural organization varies gradually as a function of paleo-  
273 cortex distance. Contrarily, there was positive relationship between inferior and superior  
274 proportions of the inferior-superior gradient and archi-cortex distance (energy-test:  $p < 0.003$ )  
275 and a negative, but non-significant, linear relationship between this gradient and archi-cortex  
276 distance ( $r_{\text{spin}} = -0.24$ ,  $p > 0.1$ ). We did not observe a consistent association between the dual  
277 origin and the posterior-anterior gradient (archi-cortex distance: energy-test:  $p > 0.1$ ,  
278  $r_{\text{spin}} = 0.12$ ,  $p > 0.1$ ; paleo-cortex: energy-test:  $p < 0.0001$ ,  $r_{\text{spin}} = -0.43$ ,  $p > 0.1$ ). Evaluating genetic

## Shaping Brain Structure

279 correlation as a function of paleo- and archi-cortex distance, we observed that genetic  
 280 correlation varied as a function of distance from both origins.

281

282 We performed a similar analysis in macaque monkeys, using the distance from archi- and  
 283 paleo-cortex reported by Goulas et al.<sup>16</sup>. We observed that the inferior-superior gradient in  
 284 structural covariance showed a positive association with archi-cortex distance (energy-test:  
 285  $p < 0.002$ ,  $r = 0.64$ ,  $p < 0.0001$ ) and a negative association with paleocortex distance (energy-test:  
 286  $p = \text{ns}$ ,  $r = -0.40$ ,  $p < 0.04$ ). Again, we did not observe a consistent association between the dual  
 287 origin and the posterior-anterior gradient (archi-cortex distance: energy-test:  $p < 0.02$ ,  $r = -0.31$ ,  
 288  $p > 0.1$ ; paleo-cortex distance: energy-test:  $p > 0.1$ ,  $r = -0.14$ ,  $p > 0.1$ ).

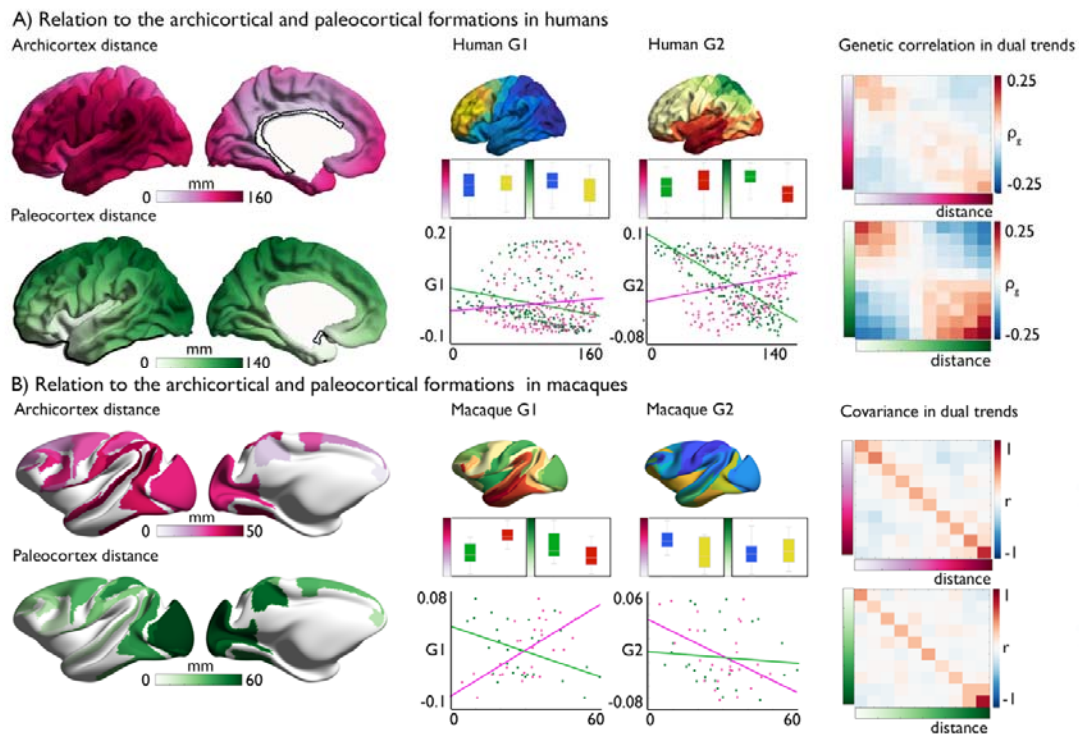

289

290 **Fig. 4. Cross-species topology of covariance as a function of the dual origin theory.**

291 **A).** Left: distance from archi-cortex and paleo-cortex in humans; Middle: Association  
 292 between G1 and G2 of genetic correlation of thickness and distance from archi-cortex and  
 293 paleo-cortex in humans (two binned gradients, as well as linear relationship); Right: genetic  
 294 correlation as a function of archi- and paleo-cortex distance; **B).** Left: Distance from archi-  
 295 cortex and paleo-cortex in macaque monkeys<sup>16</sup>; Middle: Association between G1 and G2 of  
 296 thickness covariance and distance from archi-cortex and paleo-cortex in macaque monkeys  
 297 (two binned gradients, as well as linear relationship); Right: structural covariance as a  
 298 function of archi- and paleo-cortex distance<sup>16</sup>.

## Shaping Brain Structure

### 299 **Discussion**

300 The cortical mantle is organized along axes that reflect systematic variations in brain structure  
301 and function such as laminar differentiation, gene expression, structural and functional  
302 connectivity. Although the importance of macro scale axes of cortical organization for human  
303 cognition and disorder are now recognized, the degree to which these topological features of  
304 the cerebral cortex are genetically determined remains incompletely understood. Our current  
305 study provided converging evidence that genetic influences contribute to the spatial  
306 organization of macro scale structural features of the cortex. In humans we found two robust  
307 topological patterns of macro scale organization of thickness; a posterior-anterior and an  
308 inferior-superior gradient, and almost identical organization patterns were observed when  
309 assessing genetic correlation of thickness. Furthermore, we found that similar patterns of  
310 macro scale organization of cortical thickness as are seen in humans were present in macaque  
311 monkeys. Last, we show that both in humans and macaques the inferior-superior axis could  
312 be aligned with organization patterns expected based on the theory of dual origin, providing a  
313 neurogenetic basis for observed topological patterns. Together, these different analyses  
314 provide converging evidence of the important role that genetic influences play in determining  
315 the macro scale organization of the cortex.

316

317 Our study builds on a growing body of evidence describing the organizational axes that  
318 determine the macro scale organization of specific brain features such as myeloarchitecture<sup>2-</sup>  
319 <sup>6</sup>, cytoarchitecture<sup>7-10</sup>, laminar origin of connections<sup>11,12</sup><sup>10</sup>, functional connectivity<sup>13</sup>,  
320 cortical thickness<sup>14</sup>, and gene expression<sup>6,15</sup>. Together these studies indicate that the  
321 transition from cortical areas with less to more laminar differentiation constitutes major axis  
322 of cortical organization across which cortical features systematically vary<sup>6,12,13</sup>. These  
323 variations have functional and behavioural ramifications<sup>1,13</sup> and the systematic topological  
324 organization of the cerebral cortex has been proposed to reflect an architecture which



## Shaping Brain Structure

325 optimize the balance of externally and internally oriented functioning, which is critical for  
326 flexibility of human cognition<sup>13,22,26</sup>. In the current study we uncovered two major topological  
327 axes in macro scale organization of thickness, of which the posterior-anterior gradient  
328 explained the greatest amount of variance in humans. Various studies<sup>53-56</sup> have demonstrated  
329 a posterior-anterior gradient in neuron number in the cortex of a broad range of mammalian  
330 species, including rodents, marsupials, and non-human primates<sup>1,54,57</sup>. Neuron numbers are  
331 high in posterior portions of the cortex, such as the occipital lobe, and gradually decreases  
332 toward more anterior regions. The difference in neuronal numbers has been found to relate to  
333 the temporal sequence of neurogenesis<sup>55,57</sup>, whereas posterior regions undergo a high number  
334 of cell cycles, which accounts for the higher number of neurons in these areas, in anterior  
335 regions more time is devoted to the growth of large neurons with many connections<sup>58</sup>. The  
336 posterior-anterior gradient therefore might signify a shift in computational capacity, from a  
337 high number of processing units in caudal regions, to a lower number of highly connected  
338 units in rostral regions<sup>55</sup>. Functionally, human imaging studies have placed representation of  
339 stimulus properties posteriorly, involving local computations, and more complex operations,  
340 involving integration of various functions, anteriorly<sup>59-61</sup>.

341

342 A second organizational axis in macro scale organization of thickness was identified that  
343 followed an inferior-superior pattern in humans and macaque monkeys. Inferior-superior  
344 (dorso-ventral) patterning is a key organizational principle during embryonic development of  
345 the central nervous system<sup>3,16-20,62,63</sup> and dorsal-ventral dichotomies have been reported in  
346 macaques<sup>9,64,65</sup> and humans<sup>66</sup>. Notably, the inferior-superior axis differentially related to  
347 distance from paleo- and archi-cortex respectively, aligning the inferior-superior axis in  
348 macro scale organization of thickness with the dual origin theory. This convergence suggests  
349 that our method captures at a macro scale how regions, which could be reasonably distant in  
350 space can be affiliated because they share similar origins<sup>9,16,20</sup>. The emergence of the dual

## Shaping Brain Structure

351 connectional trends might be rooted in two patterns centers in the developing pallium,  
352 resulting in two opposing neurogenetic gradients<sup>2</sup>. Both ventral and dorsal systems have been  
353 proposed to relate to differentiable functional processes. Whereas the dorsal system has been  
354 proposed to relate to time, space, and motility, the ventral system has been associated with  
355 assigning meaning and motivation<sup>66-68</sup>.

356

357 We observed differential ordering of posterior-anterior and inferior-superior gradients in  
358 humans and macaques. Whereas in humans the principal gradient traversed a posterior-  
359 anterior trajectory, we observed that in macaques this gradient was only the second  
360 description of shared variance. This difference might reflect the difference in the timing of  
361 cortical expansion between humans and macaques. For example, it has been shown that in the  
362 macaque monkey, neurogenesis ends about 20 days earlier in the rostral pole than in the most  
363 caudal regions<sup>69</sup>, in humans, however, a posterior-anterior difference of up to 70 days has  
364 been predicted<sup>57</sup>. It is possible that difference in timing of neurogenesis might describe why  
365 the same axis of organization can be more or less pronounced in different species. Previous  
366 work, using the same sample of macaques, has shown that similarity in functional cortical  
367 organization between humans and macaques decreases with geodesic distance from unimodal  
368 systems, culminates in the greater differences in posterior regions of the default network. It is  
369 possible this functional difference emerges from the different balance of the structural  
370 organizational patterns between macaques and humans. Notably, it has been suggested that  
371 the evolution of the globular shape of the human brain is related to genes involved in  
372 neurogenesis and myelination<sup>70</sup>, resulting in relatively globular shape of the brain in modern  
373 humans relative to its ancestors. It will be important for future work to explore whether  
374 differences in the emphasis placed on similar organizational patterns across different species  
375 can describe the evolutionary differences in cognitive functions between humans and other  
376 primates.

## Shaping Brain Structure

377

378 Follow up analysis indicated the posterior-anterior and inferior-superior organization  
379 gradients in macro scale organization of thickness is similar to previously described gradients  
380 in microstructural profile covariance<sup>6</sup> and functional connectivity<sup>13</sup>. The posterior-anterior  
381 gradient related to T1wT2w contrast in all layers. This is in line with previous in vivo and  
382 post-mortem evidence of an increase of mean myelin from polar towards sensory regions<sup>71,72</sup>.  
383 The dorsal-ventral dissociation was only observed in the upper two strata, with ventral  
384 regions relating to lower T1wT2 contrast than dorsal regions. Difference in upper and lower  
385 strata T1wT2w contrast has been summarized using “skewness”, indicating regions with high  
386 difference between upper and lower layers would have a low skewness, whereas regions with  
387 a small difference between upper and lower layers having a high skewness<sup>73</sup>. Dorsal regions  
388 including the sensory-motor cortex have been reported to have a low skewness, indicating a  
389 high difference in myelin between upper and lower layers. It is possible that the dorsal-ventral  
390 patterning of myelin in the upper layers reflects a dissociation in information processing, with  
391 sensory agranular regions providing feedforward information and project locally, whereas  
392 ventral, more granular paralimbic, regions are involved in feedback processing and project  
393 from infragranular layers<sup>74,75</sup>. Additionally, we found comparable topologies in  
394 microstructural profile covariance and macro scale organization of thickness, in line with  
395 previous evidence that thickness topology relates to microstructural differentiation<sup>14,76</sup>.  
396 Notably, both posterior-anterior macro scale organization patterns, as well as the combination  
397 of both the posterior-anterior and inferior-superior gradient showed a positive relation  
398 primary organizational axis of functional connectivity at rest. Our observation that a  
399 combination of gradients associated with differing neurogenetic and developmental  
400 mechanisms puts forward the hypothesis that functional organization arises through the  
401 combination of multiple structural organizational axes, and, as such, creating an architecture

## Shaping Brain Structure

402 which optimize the balance of externally and internally oriented functioning, which is critical  
403 for flexibility of human cognition.

404

405 Understanding of large-scale organization of brain structure may offer a novel and compelling  
406 model to evaluate to impact and progression of pathology. For example, it has been suggested  
407 that Parkinson's and Alzheimer's disease follows a staging trajectory, with different regions  
408 and networks affected at different stages of the disorder<sup>27,28</sup>, and its sequence determined by  
409 underlying anatomical axes. Parkinson's is assumed to show early disruptions in the lower  
410 brain stem, followed later disruption in other midbrain structures, meso-cortex and allocortex.  
411 Final stages of the disorder are characterized by disruptions in sensory-motor areas. We note  
412 that this sequence of deficits is similar to the inferior-superior axis, suggesting that  
413 understanding this feature of cortical organization may also help understand the apparent  
414 sequence of deficits in Parkinson's disease. Future work should therefore consider whether  
415 the macro scale patterns of that our analysis shows reflect the contribution of genetic  
416 influences may shed light on specific orderly sequences in symptoms that underpins  
417 Parkinson's disease, as well as other neurodegenerative conditions.

418

419 To conclude, our novel results establish that two major organizational axes in macro scale  
420 organization of thickness in human and non-human primates that are likely to be at least  
421 partially influenced by genes. We found a principal gradient stretched from posterior to  
422 anterior cortical areas, whereas a secondary gradient traversed along an inferior-superior  
423 gradient, and aligned with theories on the dual origin of the cortex. Combined, our  
424 observations provide direct evidence of a genetic basis of macro scale organizational patterns.  
425 It is of note that our findings were made possible thanks to open data initiatives. These  
426 initiatives offer the neuroimaging and network neuroscience communities an unprecedented  
427 access to large datasets for the investigation of human and non-human brains and for the

## Shaping Brain Structure

428 cross-validation of observations across data-sets and methods. Uncovering the organizational  
429 axis of the human cerebral cortex provides insights in the neurogenetic processes shaping its  
430 structural and functional organization and its relation to human cognition. Such axes can be  
431 utilized to evaluate disease progression as well as disseminate potential neurogenetic origins  
432 of abnormal cortical development.

433

434

435

436

## Shaping Brain Structure

### 437 **Materials and methods**

438

#### 439 HCP sample:

#### 440 *Participants and study design*

441 For our analysis we used the publicly available data from the Human Connectome Project  
442 S900 release (HCP; <http://www.humanconnectome.org/>), which comprised data from 970  
443 individuals (542 females), 226 MZ twins, 147 DZ twins, and 597 singletons, with mean age  
444 28.8 years (SD = 3.7, range = 22–37). We included individuals for whom the scans and data  
445 had been released (humanconnectome.org) after passing the HCP quality control and  
446 assurance standards<sup>77</sup>. The full set of inclusion and exclusion criteria are described elsewhere  
447<sup>78,79</sup>. In short, the primary participant pool comes from healthy individuals born in Missouri to  
448 families that include twins, based on data from the Missouri Department of Health and Senior  
449 Services Bureau of Vital Records. Additional recruiting efforts were used to ensure  
450 participants broadly reflect ethnic and racial composition of the U.S. population. Healthy is  
451 broadly defined, in order to gain a sample generally representative of the population at large.  
452 Sibships with individuals having severe neurodevelopmental disorders (e.g., autism),  
453 documented neuropsychiatric disorders (e.g. schizophrenia or depression) or neurologic  
454 disorders (e.g. Parkinson’s disease) are excluded, as well as individuals with diabetes or high  
455 blood pressure. Twins born prior 34 weeks of gestation and non-twins born prior 37 weeks of  
456 gestation are excluded as well. After removing individuals with missing structural imaging  
457 data our sample consisted of 899 (504 females) individuals (including 220 MZ-twins and 135  
458 DZ-twins) with a mean age of 28.8 years (SD =3.7, range =22-37).

459

#### 460 *Structural imaging processing*

461 MRI protocols of the HCP are previously described in<sup>78,79</sup>. In short, MRI data used in the  
462 study were acquired on the HCP’s custom 3T Siemens Skyra equipped with a 32-channel  
463 head coil. Two T1w images with identical parameters were acquired using a 3D-MPRAGE

## Shaping Brain Structure

464 sequence (0.7 mm isotropic voxels, matrix =  $320 \times 320$ , 256 sagittal slices; TR = 2,400 ms,  
465 TE = 2.14 ms, TI = 1,000 ms, flip angle =  $8^\circ$ ; iPAT = 2). Two T2w images were acquired  
466 using a 3D T2-SPACE sequence with identical geometry (TR = 3,200 ms, TE = 565 ms,  
467 variable flip angle; iPAT = 2). T1w and T2w scans were acquired on the same day. The  
468 pipeline used to obtain the Freesurfer-segmentation is described in detail in a previous article  
469 <sup>78</sup> and is recommended for the HCP-data. The pre-processing steps included co-registration of  
470 T1- and T2-weighted scans, B1 (bias field) correction, and segmentation and surface  
471 reconstruction using FreeSurfer version 5.3-HCP to estimate cortical thickness.

472 In addition to assess robustness and replicability of the results across different surface  
473 estimation pipelines, cortical thickness estimates were further estimated using FreeSurfer  
474 version 6.0 and CIVET. For both these additional analyses, only bias-corrected T1-weighted  
475 data were used as the input. FreeSurfer version 6.0 was performed using the default recon-all  
476 options. Surface-extraction and cortical thickness estimation using CIVET were performed  
477 using version 2.1.1 (<http://www.bic.mni.mcgill.ca/ServicesSoftware/CIVET>). The non-  
478 uniformity artefacts were corrected with the N3 algorithm (Sled et al., 1998) using the  
479 recommended N3 spline distance of 125mm for 3T T1-weighted scans. Cortical thickness was  
480 then measured as the distance between the estimated “white” and “grey” cortical surfaces, in  
481 the native space framework of the original MR images, using the same approach that is used  
482 in FreeSurfer<sup>80</sup>.

483

## 484 *Parcellation approach*

485 We used a parcellation scheme<sup>44</sup> based on the combination of a local gradient approach and a  
486 global similarity approach using a gradient-weighted Markov Random models. The  
487 parcellation has been extensively evaluated with regards to stability and convergence with  
488 histological mapping and alternative parcellations. In the context of the current study, we  
489 focus on the granularity of 400 parcels, as averaging will improve signal-to-noise. In order to

## Shaping Brain Structure

490 improve signal-to-noise and improve analysis speed, we opted to average unsmoothed  
491 structural data within each parcel. Thus, cortical thickness of each ROI was estimated as the  
492 trimmed mean (10 percent trim). Findings were additionally evaluated using different  
493 parcellation schemes using the 800 parcel Schaefer<sup>44</sup> solution, as well as the Glasser atlas<sup>47</sup>  
494 based on myelo-architecture and the Desikan-Killiany<sup>46</sup> atlas.

495

### 496 *Gradient decomposition*

497 In line with previous studies<sup>5,13</sup> the structural covariance and genetic correlation matrix, as  
498 well as age-related t-maps, were proportionally thresholded at 90% per row and converted  
499 into a normalized angle matrix using the BrainSpace toolbox for matlab<sup>52</sup>. Diffusion map  
500 embedding<sup>45</sup>, a non-linear manifold learning technique, identified principal gradient  
501 components, explaining structural covariance variance in descending order (each of  $1 \times 400$ ).  
502 In brief, the algorithm estimates a low-dimensional embedding from a high-dimensional  
503 affinity matrix. In this space, cortical nodes that are strongly interconnected by either many  
504 supra-threshold edges or few very strong edges are closer together, whereas nodes with little  
505 or no covariance are farther apart. The name of this approach, which belongs to the family of  
506 graph Laplacians, derives from the equivalence of the Euclidean distance between points in  
507 the embedded space and the diffusion distance between probability distributions centered at  
508 those points. It is controlled by a single parameter  $\alpha$ , which controls the influence of the  
509 density of sampling points on the manifold ( $\alpha = 0$ , maximal influence;  $\alpha = 1$ , no influence).  
510 Based on previous work<sup>5,13</sup> we followed recommendations and set  $\alpha = 0.5$ , a choice that  
511 retains the global relations between data points in the embedded space and has been suggested  
512 to be relatively robust to noise in the covariance matrix. Gradients were mapped onto  
513 fsaverage surface visualized using SurfStat (<http://mica-mni.github.io/surfstat>)<sup>77</sup> and we  
514 assessed the amount of variance explained. To show how the principal and secondary gradient  
515 of covariance/genetic correlation relates to systematic variations in functional organization<sup>42</sup>,



## Shaping Brain Structure

516 we calculated and plotted the mean covariance profiles within ten equally sized discrete bins  
517 of the respective gradient. To evaluate correlation between macrostructural gradients we used  
518 spin permutations<sup>35</sup>.

519

### 520 *Genetic correlation analysis*

521 To investigate the genetic correlation of brain structure, we analyzed 400 parcels of cortical  
522 thickness in a twin-based genetic correlation analysis. As in previous studies<sup>81</sup>, the  
523 quantitative genetic analyses were conducted using Sequential Oligogenic Linkage Analysis  
524 Routines (SOLAR)<sup>82</sup>. SOLAR uses maximum likelihood variance-decomposition methods to  
525 determine the relative importance of familial and environmental influences on a phenotype by  
526 modeling the covariance among family members as a function of genetic proximity. This  
527 approach can handle pedigrees of arbitrary size and complexity and thus, is optimally efficient  
528 with regard to extracting maximal genetic information. To ensure that our cortical thickness  
529 parcels were conform to the assumptions of normality, an inverse normal transformation was  
530 applied<sup>81</sup>.

531 Heritability ( $h^2$ ) represents the portion of the phenotypic variance ( $\sigma_p^2$ ) accounted for by the  
532 total additive genetic variance ( $\sigma_g^2$ ), i.e.,  $h^2 = \sigma_g^2 / \sigma_p^2$ . Phenotypes exhibiting stronger  
533 covariances between genetically more similar individuals than between genetically less  
534 similar individuals have higher heritability. Within SOLAR, this is assessed by contrasting  
535 the observed covariance matrices for a neuroimaging measure with the structure of the  
536 covariance matrix predicted by kinship. Heritability analyses were conducted with  
537 simultaneous estimation for the effects of potential covariates. For this study, we included  
538 covariates including global thickness, age, and sex.

539 To determine if shared variations in cortical thickness were influenced by the same genetic  
540 factors, genetic correlation analyses were conducted. More formally, bivariate polygenic  
541 analyses were performed to estimate genetic ( $\rho_g$ ) and environmental ( $\rho_e$ ) correlations, based

## Shaping Brain Structure

542 on the phenotypic correlation ( $\rho_p$ ), between brain structure and personality with the following  
543 formula:  $\rho_p = \rho_g \sqrt{h^2_1 h^2_2} + \rho_e \sqrt{[(1 - h^2_1)(1 - h^2_2)]}$ , where  $h^2_1$  and  $h^2_2$  are the heritability of the  
544 parcel-based cortical thickness. The significance of these correlations was tested by  
545 comparing the log likelihood for two restricted models (with either  $\rho_g$  or  $\rho_e$  constrained to be  
546 equal to 0) against the log likelihood for the model in which these parameters were estimated.  
547 A significant genetic correlation (corrected for multiple comparisons using Bonferroni  
548 correction) is evidence suggesting that (a proportion of) both phenotypes are influenced by a  
549 gene or set of genes<sup>83</sup>. To compute the contribution of genetic effects relative to the  
550 phenotypic correlation, we computed the contribution of the genetic path to the phenotypic  
551 correlation ( $\sqrt{h^2_1} \times \rho_g \times \sqrt{h^2_2}$ ) ( $\rho_{phg}$ ) divided by the phenotypic correlation. For the relative  
552 contribution of environmental correlation to the phenotypic correlation we computed ( $\sqrt{1-h^2_1}$   
553  $\times \rho_e \times \sqrt{1-h^2_2}$ ) ( $\rho_{phe}$ ) divided by the phenotypic correlation<sup>84</sup>.

554

### 555 *Geodesic distance*

556 Geodesic distance was computed between each vertex in fsaverage5 space using the Euclidian  
557 coordinates of the vertices, creating a 20484 x 20484 distance matrix. Only ipsilateral  
558 distance was considered. Following distances between parcels were computed by taking the  
559 average distance between both parcels. We evaluated the macro scale organization of  
560 thickness while controlling for distance by multiplying the covariance strength by the distance  
561 between the respective parcels.

562

### 563 *Comparisons between gradients and modalities.*

564 To make comparisons across gradient and distance maps, we used spin-tests to control for  
565 spatial autocorrelation when possible<sup>85</sup>. Difference between the two distributions of archi- and  
566 paleo-cortex distance and macro scale organizational gradients were assessed using statistical  
567 energy test, a non-parametric statistic for two sample comparisons<sup>51</sup> (<https://github>.

## Shaping Brain Structure

568 com/brian-lau/multdist/blob/master/minentest.m) and statistical significance was assessed  
569 with permutation tests (1000).

570

### 571 *Macaque sample*

572 We used the MRI data from the recently formed NHP data sharing consortium PRIME-DE  
573 [[http://fcon\\_1000.projects.nitrc.org/indi/indiPRIME.html](http://fcon_1000.projects.nitrc.org/indi/indiPRIME.html)]. Three cohorts of macaque  
574 monkeys were included in the present study (Newcastle University, Oxford University, and  
575 University of California, Davis).

576 Oxford data: The full data set consisted of 20 rhesus macaque monkeys (*macaca mulatta*)  
577 scanned on a 3T scanner with 4-channel coil. The data were collected while the animals were  
578 under anesthesia. Briefly, the macaque was sedated with intramuscular injection of ketamine  
579 (10 mg/kg) combined with either xylazine (0.125-0.25 mg/kg) or midazolam (0.1mg/kg) and  
580 buprenorphine (0.01 mg/kg). Additionally, macaques received injections of atropine (0.05  
581 mg/kg, i.m.), meloxicam (0.2 mg/kg, i.v.), and ranitidine (0.05 mg/kg, i.v.). The anesthesia  
582 was maintained with isoflurane. The details of the scan and anesthesia procedures were  
583 described in <sup>86</sup> and the PRIME-DE website  
584 ([http://fcon\\_1000.projects.nitrc.org/indi/PRIME/oxford.html](http://fcon_1000.projects.nitrc.org/indi/PRIME/oxford.html)).

585 UC-Davis Data: The full data set consisted of 19 rhesus macaque monkeys (*macaca mulatta*,  
586 all female, age=20.38 ± 0.93 years, weight=9.70 ± 1.58 kg) scanned on a Siemens Skyra 3T  
587 with 4-channel clamshell coil. All the animals were scanned under anesthesia. In brief, the  
588 macaques were sedated with injection of ketamine (10 mg/kg), dexmedetomidine (0.01  
589 mg/kg), and buprenorphine (0.01 mg/kg). The anesthesia was maintained with isoflurane at  
590 1-2%. The details of the scan and anesthesia protocol can be found at  
591 ([http://fcon\\_1000.projects.nitrc.org/indi/PRIME/ucdavis.html](http://fcon_1000.projects.nitrc.org/indi/PRIME/ucdavis.html)).

## Shaping Brain Structure

592 Newcastle data: The full data set consisted of 14 rhesus macaque monkeys (*macaca mulatta*)  
593 scanned on a Vertical Bruker 4.7T primate dedicated scanner. We restricted our analysis to 10  
594 animals (8 males, age=8.28±2.33, weight=11.76±3.38) for whom two awake resting-state  
595 fMRI scans were required. The structural T1-weighted images were acquired using MDEFT  
596 sequence with 0.6x0.6x0.6mm resolution, TE=6ms, TR=750ms.

597 MRI data processing: The structural processing includes 1) spatial denoising by a non-local  
598 mean filtering operation<sup>87</sup>, 2) brain extraction using ANTs registration with a reference brain  
599 mask followed by manually editing to fix the incorrect volume (ITK-SNAP,  
600 [www.itksnap.org](http://www.itksnap.org))<sup>88</sup>; 3) tissue segmentation and surface reconstruction (FreeSurfer)<sup>89,90</sup>; 4)  
601 the native white matter and pial surfaces were registered to the Yerkes19 macaque surface  
602 template<sup>91</sup>.

603 *Quality control:* We excluded macaque monkeys that showed a hemispheric difference of  
604 more 0.2 cm (UC Davis (0); Oxford (7), Newcastle (5)) for our final analysis, as gradient  
605 models were estimated based on covariance of ipsi- and contra-lateral covariance.

606 *Gradient analysis:* First we constructed a covariance matrix, controlling for dataset site and  
607 global thickness. Following we performed gradient analysis analogue to described in humans.

608 *Alignment of human gradients to macaque gradients:* To evaluate the similarity between  
609 human and macaque gradients we transformed the human gradient to macaque cortex based  
610 on a functional-alignment techniques recently developed. This method leverages advances in  
611 representing functional organization in high-dimensional common space and provides a  
612 transformation between human and macaque cortices.<sup>49</sup>.

613 *Archi-paleo cortex distance:* Distance from the archi – and paleo cortex was computed in  
614 Goulas et al., 2019<sup>16</sup>.

615

616

## Shaping Brain Structure

617

618 *Cortical microstructure and microstructural covariance networks.*

619 We estimated MPC using myelin-sensitive MRI (MPCMRI), in line with the previously  
620 reported protocol<sup>5</sup>, in our main sample (HCP S900). The myelin-sensitive contrast was  
621 T1w/T2w from the HCP minimal processing pipeline, which uses the T2w to correct for  
622 inhomogeneities in the T1w image. We generated 12 equivolumetric surfaces between the  
623 outer and inner cortical surfaces<sup>92</sup>. The equivolumetric model compensates for cortical  
624 folding by varying the Euclidean distance  $\rho$  between pairs of intracortical surfaces throughout  
625 the cortex to preserve the fractional volume between surfaces<sup>93</sup>.  $\rho$  was calculated as follows  
626 for each surface (1):

$$627 \quad \rho = \frac{1}{A_{out} - A_{in}} \cdot (-A_{in} + \sqrt{\alpha A_{out}^2 + (1 - \alpha)A_{in}^2}), \quad (1)$$

628 in which  $\alpha$  represents a fraction of the total volume of the segment accounted for by the  
629 surface, while  $A_{out}$  and  $A_{in}$  represents the surface area of the outer and inner cortical surfaces,  
630 respectively. We systematically sampled T1w/T2w values along 64,984 linked vertices from  
631 the outer to the inner surface across the whole cortex. Following we computed the average  
632 value of T1w/T2 in each of the 400 parcels of the Schaefer atlas<sup>44</sup>. In turn,  $MPC_{MRI}(i,j)$  for a  
633 given pair of parcels  $i$  and  $j$  is defined by (5):

$$634 \quad MPC_{MRI}(i,j) = \frac{1}{n} \sum_{s=1}^n \left( \frac{r_{ij} - r_{ic}r_{jc}}{\sqrt{(1 - r_{ic}^2)(1 - r_{jc}^2)}} \right)_s, \quad (5)$$

635 in which  $s$  is a participant and  $n$  is the number of participants. We used the  $MPC_{MRI}$  to (re-)  
636 compute the gradient of microstructure.

637

## Shaping Brain Structure

### 638 *Functional connectivity gradient*

639 The functional connectivity gradient was downloaded from (<https://www.neuroconnlab.org>)  
640 computed as part of <sup>13</sup>, based on 820 individuals from the HCP S900 release. As the gradient  
641 was reported at the fs\_32k standard space surface, values were resampled for the Schaefer  
642 400 parcellation for further analysis.

643

### 644 *Replication sample: eNKI*

#### 645 *Participants and study design*

646 To evaluate the cross-sample reproducibility of observations we additionally investigated  
647 correspondence between personality and cortical brain structure in the enhanced Nathan Kline  
648 Institute-Rockland Sample (NKI). The sample was made available by the Nathan-Kline  
649 Institute (NKI, NY, USA), as part of the ‘*enhanced NKI-Rockland sample*’  
650 (<https://www.ncbi.nlm.nih.gov/pmc/articles/PMC3472598/>). In short, eNKI was designed to  
651 yield a community-ascertained, lifespan sample in which age, ethnicity, and socioeconomic  
652 status are representative of Rockland County, New York, U.S.A. ZIP-code based recruitment  
653 and enrollments efforts were being used to avoid over-representation of any portion of the  
654 community. Participants below 6 years were excluded to balance data losses with scientific  
655 yield, as well as participants above the age of 85, as chronic illness was observed to  
656 dramatically increase after this age. All approvals regarding human subjects’ studies were  
657 sought following NKI procedures. Scans were acquired from the International Neuroimaging  
658 Data Sharing Initiative (INDI) online  
659 database [http://fcon\\_1000.projects.nitrc.org/indi/enhanced/studies.html](http://fcon_1000.projects.nitrc.org/indi/enhanced/studies.html) For our phenotypic  
660 analyses, we selected individuals with complete personality and imaging data. Our sample for  
661 phenotypic correlations consisted of 799 (400 females) individuals with a mean age of 41.1  
662 years (SD =20.3, range =12-85).

663

## Shaping Brain Structure

### 664 *Structural imaging processing*

665 3D magnetization-prepared rapid gradient-echo imaging (3D MP-RAGE) structural scans<sup>88</sup>  
666 were acquired using a 3.0 T Siemens Trio scanner with TR=2500 ms, TE=3.5 ms,  
667 Bandwidth=190 Hz/Px, field of view=256 × 256 mm, flip angle=8°, voxel size=1.0 × 1.0 ×  
668 1.0 mm. More details on image acquisition are available at  
669 [http://fcon\\_1000.projects.nitrc.org/indi/enhanced/studies.html](http://fcon_1000.projects.nitrc.org/indi/enhanced/studies.html). All T1 scans were pre-  
670 processed using the Freesurfer software library (<http://surfer.nmr.mgh.harvard.edu/>) version  
671 6.0.0<sup>80,89,90,94</sup> to compute cortical thickness. Next, the individual cortical thickness and  
672 surface area maps were standardized to fsaverage5 for further analysis. Segmentations were  
673 visually inspected for anatomical errors (S.L.V.).

674

### 675 *Modulation of structural covariance of thickness by age*

676 In the eNKI sample, we also computed the modulation of structural covariance by probing the  
677 interaction of covariance by age in the following model:

$$678 \quad T_i = \beta_0 + \beta_1 * Sex + \beta_2 * Age + \beta_3 * T_{seed} + \beta_4 * C + \beta_5 * (T_{seed} \times Age)$$

679 Following the parcel to parcel t-maps were used to compute large-scale gradients age-related  
680 changes in covariance.

681

### 682 *Replication: cortical thickness methodology*

683 Cortical thickness of the individuals of the HCP S1200 release were computed as part of an  
684 independent study (Kharabian, under review) and resampled to Schaefer 400 parcels. We  
685 utilized the extracted thickness values of FreeSurfer 6.0 to evaluate the stability of observed  
686 covariance organization as a function of cortical thickness estimation method. For the  
687 FreeSurfer 6.0. analysis of the T1-weighted images in the HCP dataset we used the default  
688 recon-all options (version (v) 6.0; ([www.surfer.nmr.mgh.harvard.edu](http://www.surfer.nmr.mgh.harvard.edu))). Moreover, cortical  
689 thickness estimation using CIVET were performed using version 2.1.1  
690 (<http://www.bic.mni.mcgill.ca/ServicesSoftware/CIVET>).

## Shaping Brain Structure

691



## Shaping Brain Structure

### 692 **Data availability**

693 All human data analyzed in this manuscript were obtained from the open-access HCP young  
694 adult sample (HCP; <http://www.humanconnectome.org/>)<sup>79</sup> and enhanced NKI-Rockland  
695 sample (<https://www.ncbi.nlm.nih.gov/pmc/articles/PMC3472598/>)<sup>95</sup>. Scans were acquired  
696 from the International Neuroimaging Data Sharing Initiative (INDI) online  
697 database [http://fcon\\_1000.projects.nitrc.org/indi/enhanced/studies.html](http://fcon_1000.projects.nitrc.org/indi/enhanced/studies.html). The raw data may not  
698 be shared by third parties due to ethics requirements, but can be downloaded directly via the  
699 above weblinks. Macaque data was obtained from the recently formed NHP data sharing  
700 consortium PRIME-DE [[http://fcon\\_1000.projects.nitrc.org/indi/indiPRIME.html](http://fcon_1000.projects.nitrc.org/indi/indiPRIME.html)]. Three  
701 cohorts of macaque monkeys were included in the present study (Newcastle University,  
702 Oxford University, and University of California, Davis). Genetic analyses were performed  
703 using Solar Eclipse 8.4.0 (<http://www.solar-eclipse-genetics.org>), and data on the KING  
704 pedigree analysis is available here: [https://www.nitrc.org/projects/se\\_linux/](https://www.nitrc.org/projects/se_linux/)<sup>82,96</sup>. Gradient  
705 mapping analyses was based on open-access tools (Brainmap,  
706 <https://brainspace.readthedocs.io/en/latest/>). Surface-wide statistical comparisons and  
707 visualizations were carried out using SurfStat [https://github.com/MICA-](https://github.com/MICA-MNI/micaopen/tree/master/surfstat)  
708 MNI/micaopen/tree/master/surfstat) in combination with colorbrewer  
709 (<https://github.com/scottclowe/cbrewer2>). Both structural covariance and genetic correlation  
710 gradients are available at  
711 ([https://github.com/sofievaik/projects/tree/master/Structure\\_of\\_Structure](https://github.com/sofievaik/projects/tree/master/Structure_of_Structure)).

712

713

## Shaping Brain Structure

### 714 **Acknowledgements**

715 We would like to thank the various contributors to the open access databases that our data was  
716 downloaded from. Specifically; HCP data were provided by the Human Connectome Project,  
717 Washington University, the University of Minnesota, and Oxford University Consortium  
718 (Principal Investigators: David Van Essen and Kamil Ugurbil;1U54MH091657) funded by  
719 the 16 NIH Institutes and Centers that support the NIH Blueprint for Neuroscience Research;  
720 and by the McDonnell Center for Systems Neuroscience at Washington University. For  
721 enhanced NKI, we would like to thank the principal support for the enhanced NKI-RS project  
722 is provided by the NIMH BRAINS R01MH094639-01 (PI Milham). Funding for key  
723 personnel was also provided in part by the New York State Office of Mental Health and  
724 Research Foundation for Mental Hygiene. Funding for the decompression and augmentation  
725 of administrative and phenotypic protocols provided by a grant from the Child Mind Institute  
726 (1FDN2012-1). Additional personnel support provided by the Center for the Developing  
727 Brain at the Child Mind Institute, as well as NIMH R01MH081218, R01MH083246, and  
728 R21MH084126. Project support also provided by the NKI Center for Advanced Brain  
729 Imaging (CABI), the Brain Research Foundation (Chicago, IL), and the Stavros Niarchos  
730 Foundation. This study was supported by the Deutsche Forschungsgemeinschaft (DFG, EI  
731 816/21-1), the National Institute of Mental Health (R01-MH074457), the Helmholtz Portfolio  
732 Theme "Supercomputing and Modeling for the Human Brain" and the European Union's  
733 Horizon 2020 Research and Innovation Program under Grant Agreement No. 785907 (HBP  
734 SGA2). BTTY is supported by the Singapore National Research Foundation (NRF)  
735 Fellowship (Class of 2017). BB acknowledges support from the SickKids Foundation (NI17-  
736 039), the National Sciences and Engineering Research Council of Canada (NSERC;  
737 Discovery-1304413), CIHR (FDN-154298), Azrieli Center for Autism Research (ACAR), an  
738 MNI-Cambridge collaboration grant, and the Canada Research Chairs program. CP was

## Shaping Brain Structure

739 funded through a postdoctoral fellowship of the Fonds de la Recherche due Quebec – Santé  
740 (FRQ-S).

### 741 **Supplementary Results**

#### 742 *Replication of structural covariance gradients in eNKI dataset*

743 To evaluate whether the observed organizational axes of structural covariance could also be  
744 observed in different datasets with a wider age-range, we evaluated the structural covariance  
745 gradients in the eNKI dataset (792 individuals, ages 8-85yrs). Here we observed, similar to  
746 the main observations in the HCP dataset, a principal anterior posterior gradient explaining  
747 15% of variance and a secondary gradient traversing from inferior to superior regions  
748 explaining 11% of variance. Though overall patterns were highly comparable (G1:  $r_{\text{spin}}=0.81$ ,  
749  $p<0.0001$ , G2:  $r_{\text{spin}}=0.88$ ,  $p<0.0001$ ) between HCP and eNKI covariance gradients  
750 (**Supplementary Figure 1**).

751

#### 752 *Association between ageing and structural covariance organization axes*

753 As the eNKI dataset had a broad age distribution we evaluated whether the effect of age on  
754 covariance was also organized along posterior-anterior and inferior-superior axis. For this we  
755 computed the t-maps of age-related modulation of covariance, and performed gradient  
756 analysis on the t-maps. Again, we observed a principal gradient (14% of variance) traversing  
757 from posterior to anterior regions, and a secondary gradient (12% of variance) traversing from  
758 inferior to superior regions. These gradients showed high correlation with the overall  
759 principal and secondary gradients in this dataset (G1:  $r_{\text{spin}}=0.76$ ,  $p<0.0001$ , G2:  $r_{\text{spin}}=0.63$ ,  
760  $p<0.0001$ ) (**Supplementary Figure 3**).

761

#### 762 *The third – eight gradient of thickness covariance and genetic correlation of thickness.*

763 Additionally, we studied the third-eight gradient of thickness covariance and genetic  
764 correlation of thickness, explaining 5-10% of variance (**Supplementary Figure 1 and 2**). The

### Shaping Brain Structure

765 third gradient traversed from sensory-motor and mid temporal areas to both frontal and  
766 occipital cortices, and a comparable gradient was observed in genetic correlation of thickness.  
767 The fourth gradient had a bilateral axis in superior dorsolateral frontal cortex on the one hand  
768 and frontal polar, parietal and temporal polar regions on the other hand. The fifth gradient  
769 showed strong lateralization between left temporal parietal regions and right lingual gyrus and  
770 corresponded to the sixth gradient of genetic correlation of thickness. The sixth gradient was  
771 centered in the right supramarginal gyrus extending to sensory-motor areas on the one hand,  
772 and less so in the left sensory cortex, and on the other hand precuneus and para-limbic areas, a  
773 similar gradient was not observed in genetic correlation of thickness. The seventh gradient  
774 related to sensory-motor, fusiform gyrus and posterior-mid cingulate on the one hand, and  
775 temporal regions and precuneus on the other and was most pronounced in the right  
776 hemisphere, this gradient was similar to the fifth gradient in heritability of thickness. The  
777 eighth gradient showed a dissociation between temporal parietal regions and posterior-mid  
778 cingulate on the one hand, and occipital and sensory regions on the other.

779

780 *Structural gradients are above and beyond geodesic distance.*

781 Previous work has shown a strong relationship between structural thickness covariance,  
782 genetic correlation of cortical thickness, and geodesic distance<sup>15</sup>. Thus, we explored the  
783 relationship between organization of structural covariance and geodesic distance. Geodesic  
784 distance was defined as the average distance between each of the 400 parcels ipsilaterally  
785 (**Supplementary Figure 10**). In line with previous reports, we observed a strong relation  
786 between structural covariance and geodesic distance (left hemisphere:  $r=-0.52$ ,  $p<0.00001$ ,  
787 right hemisphere:  $r=0.51$ ,  $p<0.00001$ ). Moreover, we observed that genetic correlation varied  
788 as a function of the organization of distance, with regions at comparable levels of the geodesic  
789 distance gradients showing high genetic correlation among each other. Importantly, when  
790 controlling for geodesic distance we again observed an inferior-superior gradient and a

## Shaping Brain Structure

791 posterior-anterior gradient, suggesting the organizational patterns in covariance exist above  
792 and beyond geodesic distance. Notably, comparing the topological organization based on  
793 geodesic distance and structural covariance, we observed that especially regions in the  
794 temporal-parietal areas showed stronger covariance than expected based on distance along,  
795 whereas regions in sensory-motor areas showed less covariance than expected based on  
796 distance (**Supplementary Figure 11**).

797  
798 *Relationship between large-scale organization of genetic correlation of regional thickness*  
799 *and microstructure profiles*

800 In a last step we evaluated the association between the two main axis of regional covariance  
801 topology and cortical microstructure (T1w/T2w), microstructural covariance gradients <sup>6</sup>, and  
802 large-scale organization of functional connectivity <sup>7</sup>, in order to qualify and quantify the  
803 relation of the observed covariance gradients in thickness to previously reported  
804 microstructural and functional cortical organization<sup>6,7</sup>. We probed cortical microstructure at  
805 12 equidistant surfaces sampled between the outer and inner cortical layer <sup>6</sup> in the same  
806 participants (HCP S900 sample). We observed a strong negative relationship between  $G1_{scov}$   
807 and cortical T1w/T2w at all layer depths ( $-0.34 < r > -0.44$ ) (**Supplementary Figure 12A;**  
808 **Supplementary Table 4**).  $G2_{scov}$ , however, only showed a significant positive association  
809 with the two most outer strata (layer 1:  $r=0.60$ , layer 2:  $r=0.40$ ), but not with layers closer to  
810 the GM/WM surface (**Supplementary Figure 12A; Supplementary Table 5**). Following we  
811 probed the association between organizational gradients of within-individual microstructural  
812 profile covariance and topological organization of structural covariance of cortical thickness.  
813 To do so, we computed the mean microstructural profile covariance (MPC) maps across  
814 individuals and performed gradient decomposition. We observed, as previously reported <sup>6</sup>, a  
815 primary gradient of cortical microstructural profile covariance traversing a sensory-fugal  
816 pattern (22% of variance), and secondary gradient (17% of variance) traversing a pattern from

## Shaping Brain Structure

817 sensory-motor to frontal cortices. We found that the first MPC gradient showed a close  
818 correlation with the inferior-superior gradient of genetic covariance of thickness ( $r=0.62$ ,  
819  $p<0.00001$ ), but not with the posterior-anterior gradient of genetic covariance of thickness  
820 ( $r=-0.02$ ). Conversely, the secondary gradient of MPC was associated with the posterior-  
821 anterior gradient of genetic covariance of thickness ( $r=0.30$ ,  $p<0.00001$ ), but not with the  
822 inferior-superior gradient of genetic covariance ( $r=-0.09$ ,  $p>0.1$ ).

823

824 *Relationship between large-scale organization of genetic correlation of regional thickness*  
825 *and functional connectivity topology.*

826 Next, we evaluated the association between the posterior-anterior and inferior-superior  
827 covariance gradients and the previously reported large-scale organizational gradient of  
828 functional connectivity (constructed based on functional connectivity maps in a subset of the  
829 HCP S900 sample)<sup>7</sup> (**Supplementary Figure 12**). We observed that the functional gradient  
830 showed a positive correlation with the rostral-caudal gradient ( $r=0.37$  [0.23 0.49],  $p<0.00001$ )  
831 but not with the ventral-dorsal gradient alone did not relate to the large-scale functional  
832 gradient ( $r=0.08$  [-0.04 0.23],  $p<0.1$ ). At the same time, the combination of the both gradients  
833 showed a strong association with large-scale functional organization ( $r=0.45$  [0.33 0.58],  
834  $p<0.00001$ ), above and beyond the association with rostro-caudal patterns alone ( $r_{\text{diff}} -0.08$  [-  
835 0.18 -0.01]). Indeed, combining the rostro-caudal and ventral dorsal gradient partially  
836 revealed an organization patterns from unimodal (visual and sensory-motor cortex) to  
837 heteromodal association areas (frontal and temporal cortex). Genetic correlation was observed  
838 to vary as a function of the combination of gradients and was strongest in regions at similar  
839 levels of the combined gradient. Last, we evaluated genetic correlation patterns as a function  
840 of the functional gradient reported by Margulies<sup>7</sup>. We observed genetic correlation also varied  
841 as a function of large-scale organization of functional connectivity, with regions at similar

## Shaping Brain Structure

842 gradient levels (probed in 10 equally sized bins) showing stronger genetic correlation relative  
843 to regions at different gradient levels.

844

845

846

847 *Functional topography along macro scale organizational patterns of thickness*

848 We conducted a meta-analysis using the Neurosynth<sup>97</sup> database and estimated the center of  
849 gravity across a set of diverse cognitive terms<sup>5,13</sup> along the posterior-anterior and inferior-  
850 superior macro scale organization patterns of thickness (**Supplementary Figure 13**). In the  
851 posterior-anterior gradient we observed a divergence between sensory and visual functions  
852 posteriorly and ‘working-memory’, ‘reading’, as well as ‘motor’ and ‘action’ processing  
853 anteriorly. Various terms such as ‘emotion’ and ‘reward’ related to both posterior and anterior  
854 regions. The inferior-superior gradient on the other hand related to ‘motor’, ‘working  
855 memory’ and ‘action’ in superior regions, but ‘emotion’, ‘reward’, ‘affective’, ‘pain’ in  
856 inferior regions.

857

858

Shaping Brain Structure

859 **Supplementary Figures**

860

861 **SUPPLEMENTARY TABLES**

862

| <b>Functional networks</b>             | <i>Visual</i> | <i>Sensory-Motor</i> | <i>Dorsal attention</i> | <i>Ventral attention</i> | <i>Limbic</i> | <i>Fronto-parietal network</i> | <i>Default mode network</i> |
|----------------------------------------|---------------|----------------------|-------------------------|--------------------------|---------------|--------------------------------|-----------------------------|
| <i>Visual</i>                          | 0,09          | -0,01                | -0,01                   | -0,02                    | -0,01         | -0,04                          | -0,03                       |
| <i>Sensory Motor</i>                   | -0,01         | 0,04                 | 0,01                    | 0,00                     | -0,03         | -0,01                          | -0,02                       |
| <i>Dorsal attention</i>                | -0,01         | 0,01                 | 0,05                    | -0,01                    | -0,05         | 0,01                           | -0,01                       |
| <i>Ventral attention</i>               | -0,02         | 0,00                 | -0,01                   | 0,01                     | -0,01         | 0,00                           | 0,00                        |
| <i>Limbic</i>                          | -0,01         | -0,03                | -0,05                   | -0,01                    | 0,09          | -0,01                          | 0,01                        |
| <i>Fronto-parietal control network</i> | -0,04         | -0,01                | 0,01                    | 0,00                     | -0,01         | 0,03                           | 0,01                        |
| <i>Default mode network</i>            | -0,03         | -0,02                | -0,01                   | 0,00                     | 0,01          | 0,01                           | 0,02                        |

863 **Supplementary Table 1. Average structural covariance (Spearman's rho) in each**  
 864 **cytoarchitectural and functional network.** Corresponding table to Figure 1Bi, indicating  
 865 the average covariance of regions within the respective functional networks.  
 866

| <b>Functional networks</b> | <b>Visual</b> | <b>Sensory-Motor</b> | <b>Dorsal attention</b> | <b>Ventral attention</b> | <b>Limbic</b> | <b>Fronto-parietal network</b> | <b>Default mode network</b> |
|----------------------------|---------------|----------------------|-------------------------|--------------------------|---------------|--------------------------------|-----------------------------|
| <b>1</b>                   | 0,25          | 0,00                 | 0,00                    | -0,06                    | -0,01         | -0,11                          | -0,08                       |
| <b>2</b>                   | 0,00          | 0,10                 | 0,04                    | 0,00                     | -0,07         | -0,04                          | -0,05                       |
| <b>3</b>                   | 0,00          | 0,04                 | 0,20                    | 0,02                     | -0,15         | 0,04                           | -0,02                       |
| <b>4</b>                   | -0,06         | -0,01                | 0,01                    | 0,04                     | -0,03         | 0,01                           | 0,01                        |
| <b>5</b>                   | -0,01         | -0,07                | -0,14                   | -0,03                    | 0,20          | -0,03                          | 0,02                        |
| <b>6</b>                   | -0,11         | -0,04                | 0,04                    | 0,01                     | -0,02         | 0,10                           | 0,05                        |
| <b>7</b>                   | -0,08         | -0,05                | -0,02                   | 0,01                     | 0,02          | 0,06                           | 0,05                        |

867 **Supplementary Table 2. Average genetic correlation between each functional network.**  
 868 Table based on Figure 2Ai.  
 869

| <b>Functional networks</b> | <b>Visual</b> | <b>Sensory-Motor</b> | <b>Dorsal attention</b> | <b>Ventral attention</b> | <b>Limbic</b> | <b>Fronto-parietal network</b> | <b>Default mode network</b> |
|----------------------------|---------------|----------------------|-------------------------|--------------------------|---------------|--------------------------------|-----------------------------|
| <b>1</b>                   | 0,01          | -0,01                | 0,00                    | -0,01                    | -0,01         | 0,00                           | 0,00                        |
| <b>2</b>                   | -0,01         | 0,01                 | 0,00                    | 0,00                     | -0,01         | -0,01                          | -0,01                       |
| <b>3</b>                   | 0,00          | 0,00                 | 0,01                    | -0,01                    | -0,02         | 0,00                           | 0,00                        |
| <b>4</b>                   | -0,01         | 0,00                 | -0,01                   | 0,00                     | -0,01         | 0,00                           | 0,00                        |
| <b>5</b>                   | 0,00          | -0,01                | -0,02                   | -0,01                    | 0,05          | -0,01                          | -0,01                       |
| <b>6</b>                   | 0,00          | -0,01                | 0,00                    | 0,00                     | -0,01         | 0,01                           | 0,00                        |
| <b>7</b>                   | 0,00          | -0,01                | 0,00                    | 0,00                     | -0,01         | 0,00                           | 0,00                        |

870 **Supplementary Table 3. Average environmental correlation between each functional**  
 871 **network.** Table based on Figure 2Bi.  
 872

| T1w/T2w | Correlation with G1 | T1w/T2w | Correlation with G1 |
|---------|---------------------|---------|---------------------|
| Layer 1 | -0.34, p<0.000001   | Layer 7 | -0.42, p<0.000001   |
| Layer 2 | -0.40, p<0.000001   | Layer 8 | -0.43, p<0.000001   |



## Shaping Brain Structure

|         |                   |          |                   |
|---------|-------------------|----------|-------------------|
| Layer 3 | -0.40, p<0.000001 | Layer 9  | -0.43, p<0.000001 |
| Layer 4 | -0.38, p<0.000001 | Layer 10 | -0.44, p<0.000001 |
| Layer 5 | -0.39, p<0.000001 | Layer 11 | -0.43, p<0.000001 |
| Layer 6 | -0.40, p<0.000001 | Layer 12 | -0.43, p<0.000001 |

873 **Supplementary Table 4. Correlation between layer-dependent T1q and G1<sub>GC</sub>.**  
874 Correlation between layer-based T1w/T2w and the primary gradient of thickness covariance.  
875

| T1w/T2w | Correlation with G2 | T1w/T2w  | Correlation with G2 |
|---------|---------------------|----------|---------------------|
| Layer 1 | 0.64, p<0.000001    | Layer 7  | -0.05, p>ns         |
| Layer 2 | 0.40, p<0.000001    | Layer 8  | -0.04, p>ns         |
| Layer 3 | 0.12, p<0.02        | Layer 9  | -0.03, p>ns         |
| Layer 4 | -0.01, p>ns         | Layer 10 | -0.03, p>ns         |
| Layer 5 | -0.05, p>ns         | Layer 11 | -0.02, p>ns         |
| Layer 6 | -0.05, p>ns         | Layer 12 | 0.00, p>ns          |

876 **Supplementary Table 5. Correlation between layer-dependent T1q and G2<sub>GC</sub>.**  
877 Correlation between layer-based T1w/T2w and the secondary gradient of thickness  
878 covariance.  
879  
880

## Shaping Brain Structure

881 SUPPLEMENTARY FIGURES  
882

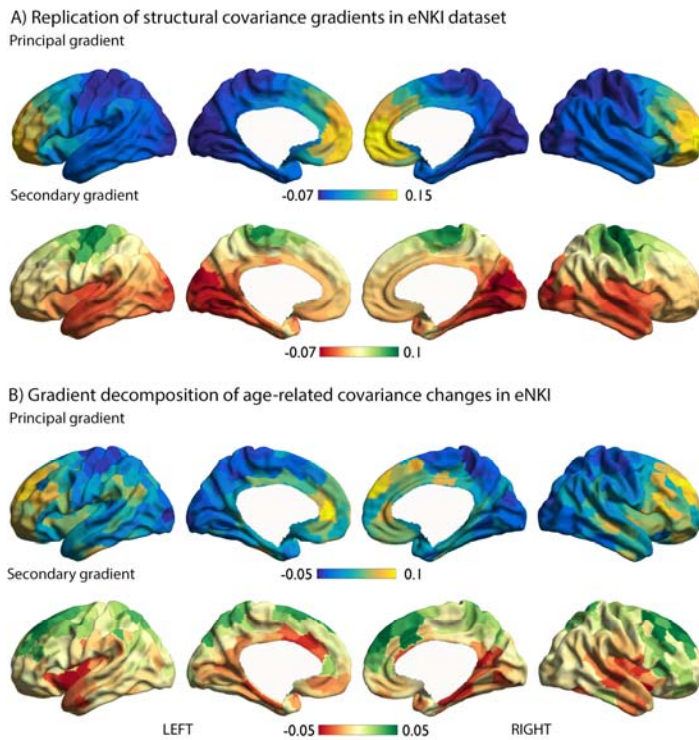

883  
884 **Supplementary Fig 1. Robustness of structural covariance gradients using replication**  
885 **sample (eNKI) and associations with age-related change in covariance.** A). Replication of  
886 the first two gradients in the eNKI dataset, using the Schaefer 400 parcellation. B). Gradient  
887 decomposition of t-maps of age-related modulation of structural covariance.  
888

## Shaping Brain Structure

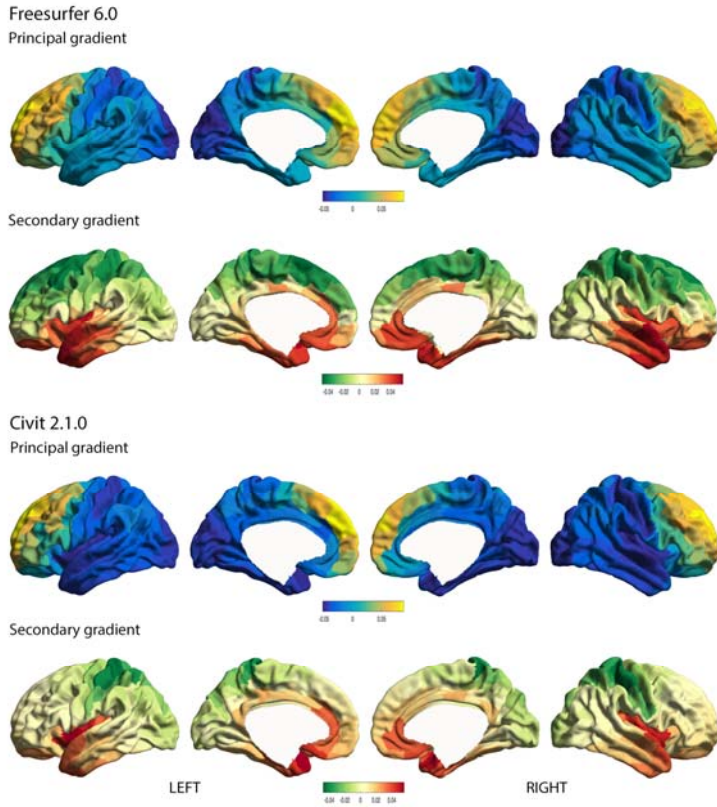

889  
890  
891  
892  
893  
894

**Supplementary Fig 2. Robustness of structural covariance gradients as a function of cortical thickness estimation method.** A). Cortical thickness estimation in HCP sample based on Freesurfer 6.0 standard pipeline. B). Cortical thickness estimation in HCP sample based on CIVIT 2.1.0. standard pipeline.

## Shaping Brain Structure

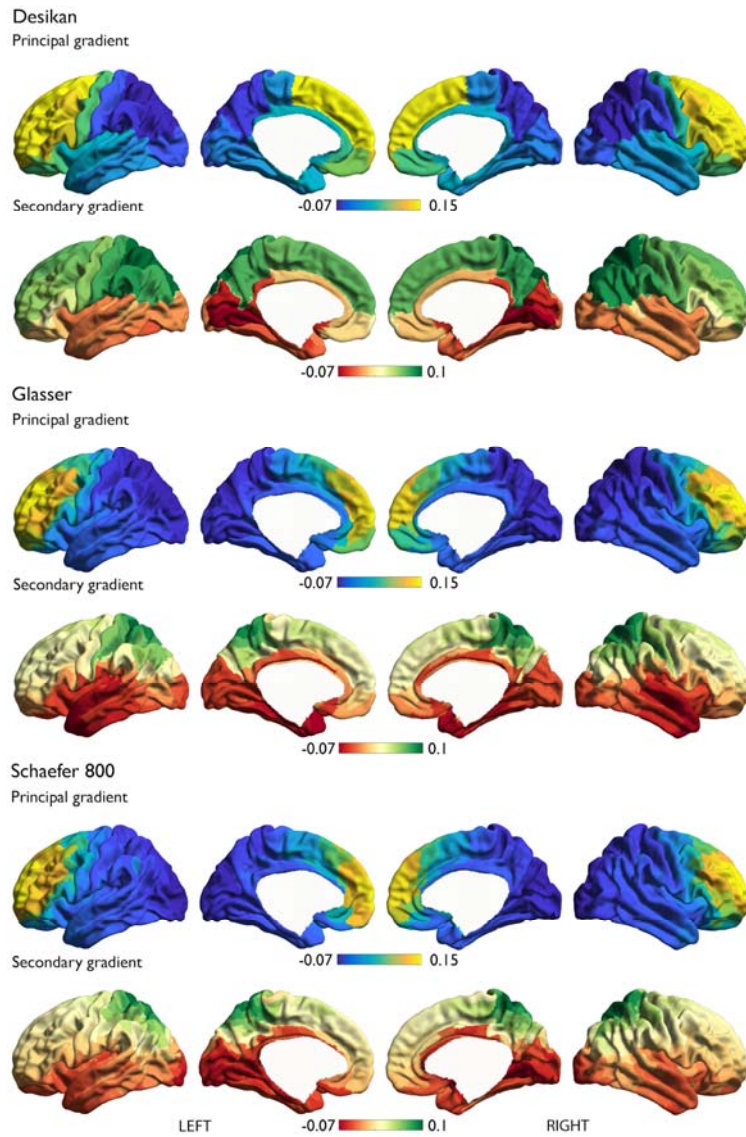

895  
896  
897  
898  
899  
900  
901

**Supplementary Figure 3. Robustness of structural covariance gradients as a function of parcellation method.** A). Cortical thickness parcellated using the Desikan-Killiany atlas; B). Cortical thickness parcellated using the Glasser atlas; C). Cortical thickness parcellated using the Schaefer 800 atlas

## Shaping Brain Structure

Structural covariance gradient 3-8

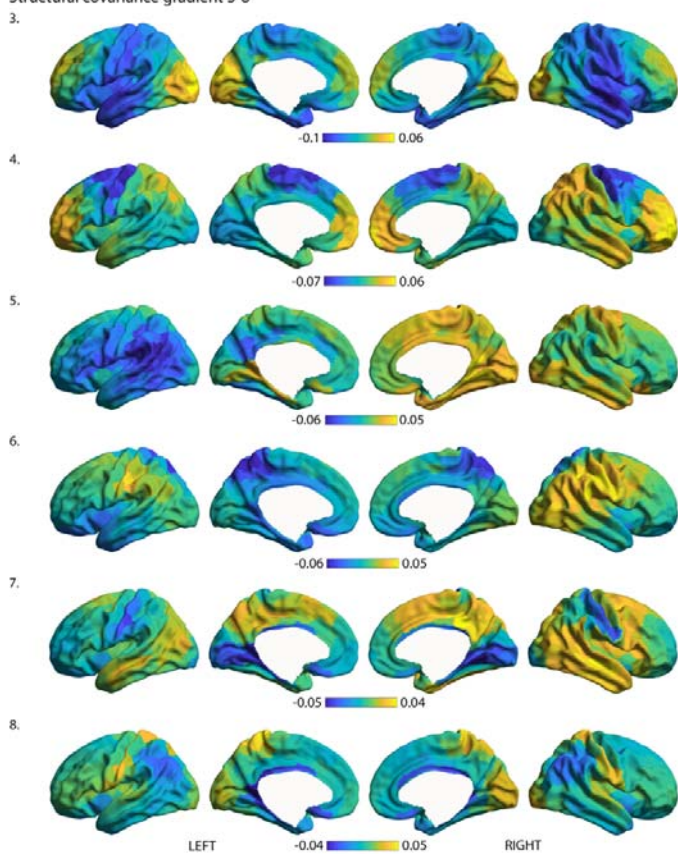

902  
903  
904  
905

**Supplementary Figure 4. Structural covariance gradients 3-8.** The third-eight gradient of structural covariance of thickness.

A) Correlation between structural covariance and genetic/environmental correlation of thickness

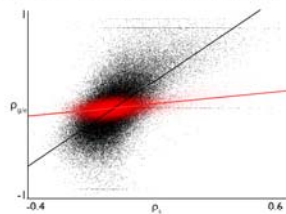

B) Correlation between structural covariance and genetic correlation within functional network

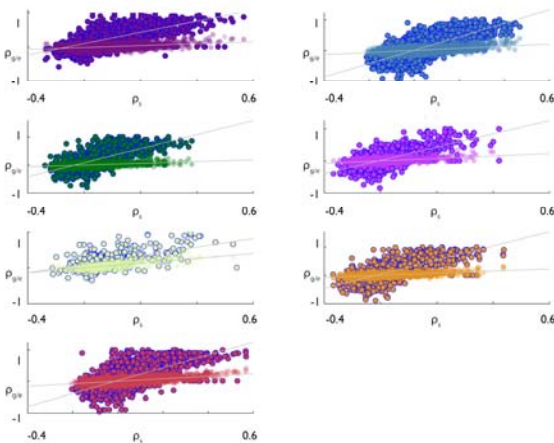

906

## Shaping Brain Structure

907 **Supplementary Figure 5. Correlation between structural covariance of thickness and**  
908 **genetic and environmental components.** A). Whole brain correlation between covariance  
909 and genetic correlation (black) and environmental correlation (red). B). Correlation between  
910 covariance and genetic correlation (blue outline) and environmental correlation (no outline)  
911 within each functional community<sup>25</sup>.  
912

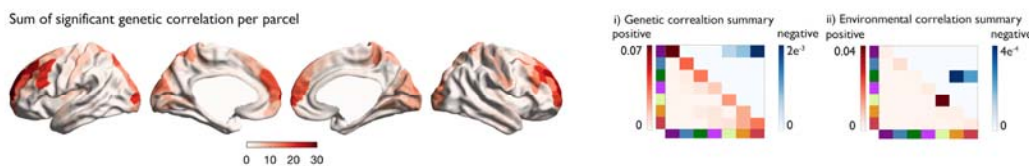

913 **Supplementary Figure 6. Spatial distribution of significant genetic correlations.** Sum of  
914 significant genetic correlation per parcel (FDRq<0.05); i). genetic correlation summary per  
915 functional community (averaged by the total number of parcels in each functional network)  
916 (positive: red; negative: blue); ii). genetic correlation summary per functional community  
917 (averaged by the total number of parcels in each functional network) (positive: red;  
918 negative: blue)  
919  
920

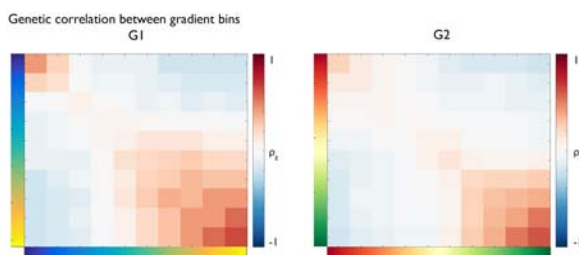

921 **Supplementary Figure 7. Genetic correlation between gradient bins.** The average genetic  
922 correlation between binned (10 equally sized bins) principal and secondary gradients of  
923 genetic correlation (Figure 2).  
924  
925

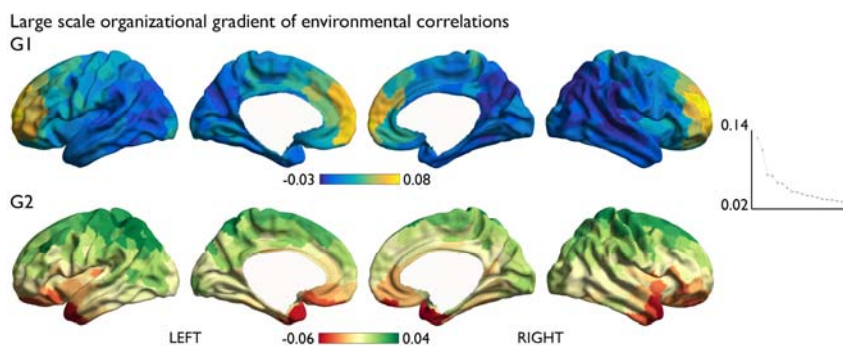

926 **Supplementary Figure 8. Large-scale organizational gradients of environmental**  
927 **correlations of thickness.** Performing the same analysis as in Figure 2C on the  
928 environmental correlation of thickness.  
929  
930

## Shaping Brain Structure

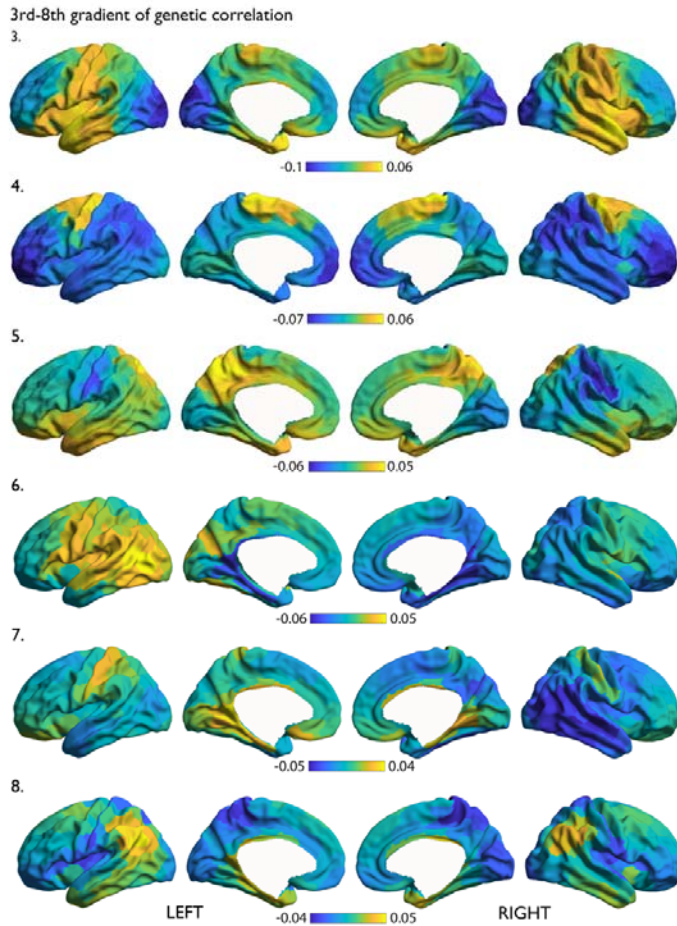

931  
932  
933  
934

**Supplementary Figure 9. Genetic correlation gradients 3-8.** The third-eight gradient of genetic correlation of thickness.

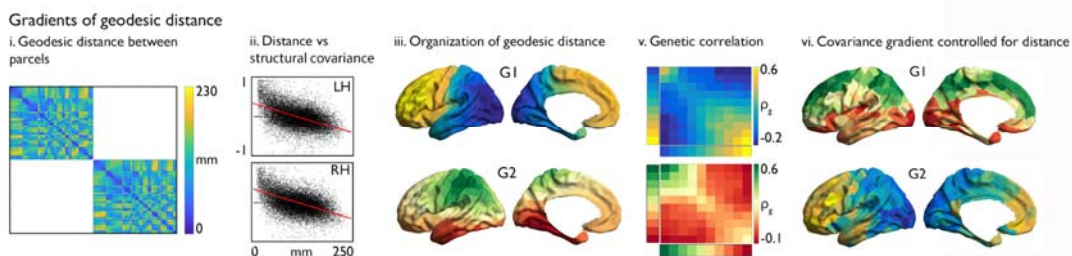

935  
936  
937  
938  
939  
940  
941  
942

**Supplementary Fig 10. Association between large-scale organization of structural covariance and geodesic distance** i). Geodesic distance matrix of ipsilateral 400 Schaefer parcels; ii). Correlation between geodesic distance and structural covariance between parcels; iii). Principal and secondary gradient of geodesic distance; iv). Genetic correlation as a function of the binned geodesic distance gradients; v). Covariance gradients while controlling for geodesic distance.

## Shaping Brain Structure

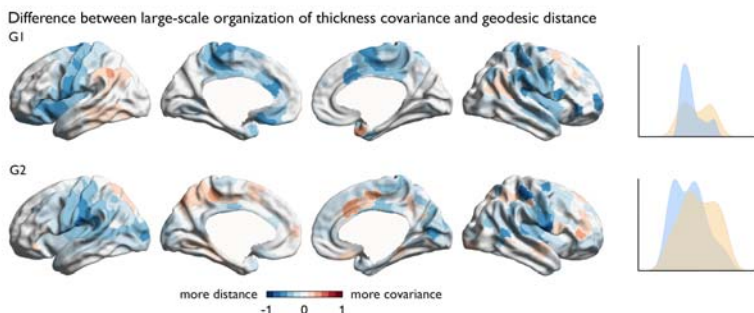

943  
944  
945  
946  
947  
948  
949

**Supplementary Fig 11. Parcel-wise difference between large-scale organization of structural covariance and geodesic distance.** Parcel-wise difference between the structural covariance gradients ( $G_{SCOV}$ ) and the distance-based gradients ( $G_{DIST}$ ). Blue indicates higher gradient ranking in  $G_{DIST}$ , red indicates higher gradient ranking in  $G_{SCOV}$ .

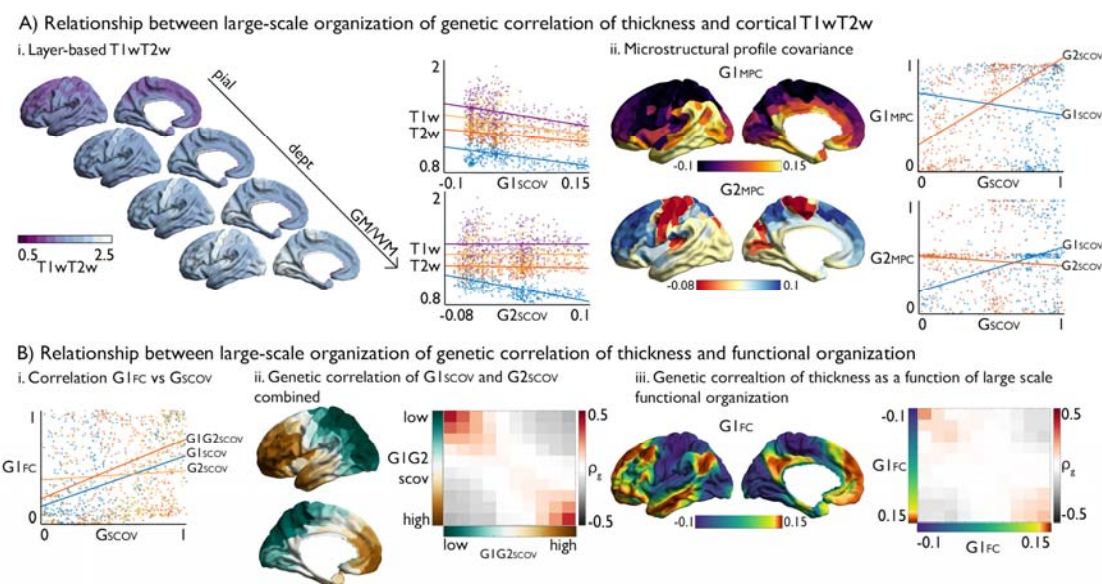

950  
951  
952  
953  
954  
955  
956  
957  
958  
959  
960  
961  
962  
963  
964  
965

**Supplementary Fig 12. Link between organization of macro scale organization of thickness, microstructure, and function.** **A).** Relationship between large-scale organization of genetic correlation of thickness and cortical T1w/T2w; i. T1w/T2w values of equidistant layers between the pial and GM/WM surface and the correlation with the principal and secondary gradient ( $G1_{SCOV}$  and  $G2_{SCOV}$ ) of macro scale organization of thickness. For visualization purposes only the first (blue), fourth (orange), seventh (yellow), tenth (purple) of 12 probed layers are reported; ii. Principal and secondary gradient of microstructure profile covariance (MPC) and the relationship between MPC gradients and  $G1_{SCOV}$  and  $G2_{SCOV}$ . **B).** Relationship between large-scale organization of thickness covariance and functional organization; i. the correlation between  $G1_{SCOV}$ ,  $G2_{SCOV}$ ,  $G1G2_{SCOV}$  and  $G1_{FC}$ ; ii. Combined  $G1_{SCOV}$  and  $G2_{SCOV}$  gradient, the genetic correlation between binned  $G1G2_{SCOV}$  gradient, and the correlation between  $G1_{SCOV}$ ,  $G2_{SCOV}$ ,  $G1G2_{SCOV}$  and  $G1_{FC}$ ; iii. Principal gradient of large-scale functional organization and genetic correlation of thickness between  $G1_{FC}$  gradient bins.



## Shaping Brain Structure

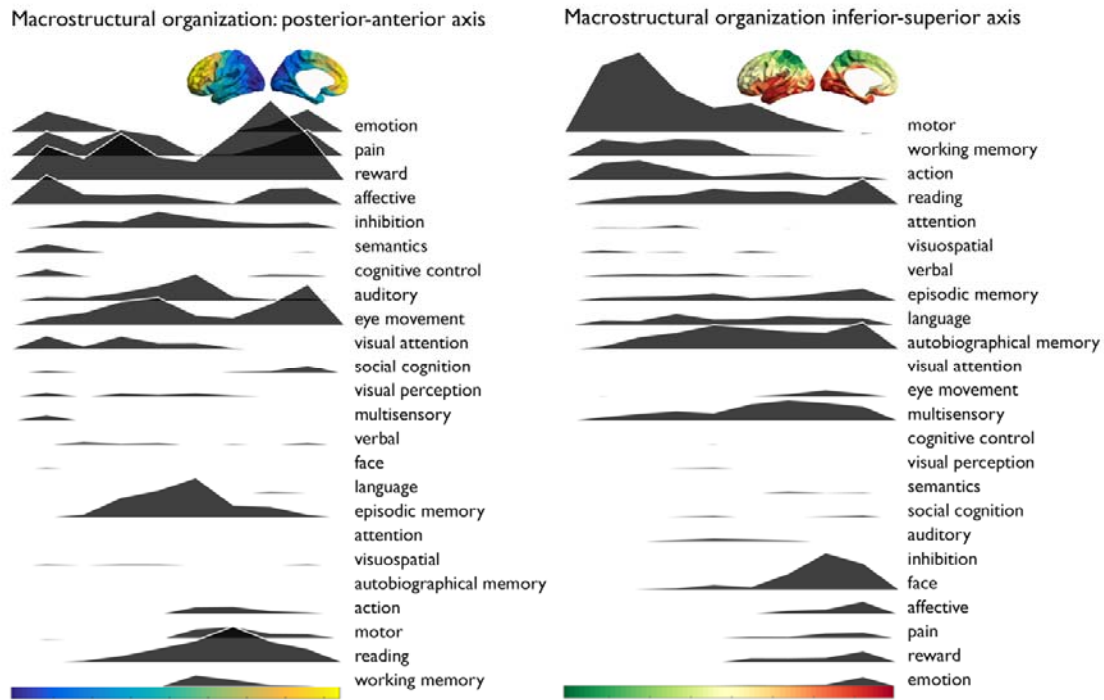

966

967 **Supplementary Fig 13.** Meta-analysis maps for diverse cognitive terms were obtained from  
968 Neurosynth similar to Margulies et al.<sup>13</sup>. We calculated parcel-wise z-statistics, capturing  
969 node-term associations, and calculated the center of gravity of each term along the poster-  
970 anterior and inferior-superior gradients. The plots depict the average z-score within binned  
971 (20-bins) gradient layer of meta-analysis maps.

972

973

974

975

976

977

## Shaping Brain Structure

978

- 979 1     Huntenburg, J. M., Bazin, P. L. & Margulies, D. S. Large-Scale Gradients in Human  
980     Cortical Organization. *Trends Cogn Sci* **22**, 21-31, doi:10.1016/j.tics.2017.11.002  
981     (2018).
- 982 2     Brockhaus, H. Die cyto- und myeloarchtekonik des Cortex claustralis und des  
983     Claustrum beim Menschen. *J. Psychol. Neurol.* **49**, 249-348 (1940).
- 984 3     Sanides, F. *Die Archtekonik des Menschlichen Stirnhirns.* (Springer, 1962).
- 985 4     Huntenburg, J. M. *et al.* A Systematic Relationship Between Functional Connectivity  
986     and Intracortical Myelin in the Human Cerebral Cortex. *Cereb Cortex* **27**, 981-997,  
987     doi:10.1093/cercor/bhx030 (2017).
- 988 5     Paquola, C. *et al.* Microstructural and functional gradients are increasingly  
989     dissociated in transmodal cortices. *PLoS Biol* **17**, e3000284,  
990     doi:10.1371/journal.pbio.3000284 (2019).
- 991 6     Fulcher, B. D., Murray, J. D., Zerbi, V. & Wang, X. J. Multimodal gradients across  
992     mouse cortex. *Proc Natl Acad Sci U S A*, doi:10.1073/pnas.1814144116 (2019).
- 993 7     von Bonin, G. & Bailey, P. in *Primatologia* Vol. 2 Ch. 10, (S. Karger, 1961).
- 994 8     Sanides, F. The Cyto-Myeloarchitecture of the Human Frontal Lobe and Its Relation to  
995     Phylogenetic Differentiation of the Cerebral Cortex. *J Hirnforsch* **7**, 269-282 (1964).
- 996 9     Pandya, D. N. & Yeterian, E. H. in *Association and auditory cortices* (eds A. Peters &  
997     E. G. Jones) 3-61 (Springer Science Business Media, 1985).
- 998 10    Garcia-Cabezas, M. A., Zikopoulos, B. & Barbas, H. The Structural Model: a theory  
999    linking connections, plasticity, pathology, development and evolution of the cerebral  
1000    cortex. *Brain Struct Funct* **224**, 985-1008, doi:10.1007/s00429-019-01841-9 (2019).
- 1001 11    Barbas, H. Pattern in the laminar origin of corticocortical connections. *J Comp Neurol*  
1002    **252**, 415-422, doi:10.1002/cne.902520310 (1986).
- 1003 12    Goulas, A., Betzel, R. F. & Hilgetag, C. C. Spatiotemporal ontogeny of brain wiring. *Sci*  
1004    *Adv* **5**, eaav9694, doi:10.1126/sciadv.aav9694 (2019).
- 1005 13    Margulies, D. S. *et al.* Situating the default-mode network along a principal gradient  
1006    of macroscale cortical organization. *Proc Natl Acad Sci U S A* **113**, 12574-12579,  
1007    doi:10.1073/pnas.1608282113 (2016).
- 1008 14    Wagstyl, K., Ronan, L., Goodyer, I. M. & Fletcher, P. C. Cortical thickness gradients in  
1009    structural hierarchies. *Neuroimage* **111**, 241-250,  
1010    doi:10.1016/j.neuroimage.2015.02.036 (2015).
- 1011 15    Burt, J. B. *et al.* Hierarchy of transcriptomic specialization across human cortex  
1012    captured by structural neuroimaging topography. *Nat Neurosci* **21**, 1251-1259,  
1013    doi:10.1038/s41593-018-0195-0 (2018).
- 1014 16    Goulas, A., Margulies, D. S., Bezgin, G. & Hilgetag, C. C. The architecture of  
1015    mammalian cortical connectomes in light of the theory of the dual origin of the  
1016    cerebral cortex. *Cortex* **118**, 244-261, doi:10.1016/j.cortex.2019.03.002 (2019).
- 1017 17    Abbie, A. A. Cortical lamination in a polyprotodont marsupial *Perameles nasuta*.  
1018    *Journal of Comparative Neurology* **76**, 506-536 (1942).
- 1019 18    Abbie, A. A. Cortical lamination in the monotremata. *Journal of Comparative*  
1020    *Neurology* **72**, 429-467 (1940).
- 1021 19    Sanides, F. *Functional architecture of motor and sensory cortices in primates in the*  
1022    *light of a ne concept of neocortex evolution.*, (Appleton-Century-Crofts Educational  
1023    Division/Meredith Corporation, 1970).
- 1024 20    Pandya, D. N., Petrides, M., Seltzer, B. & Cipolloni, B. P. *Cerebral cortex: Architecture,*  
1025    *connections, and the dual origin concept.*, (Oxford Press, 2015).

## Shaping Brain Structure

- 1026 21 Dart, R. A. The Dual Structure of the Neopallium: its History and Significance. *J Anat*  
1027 **69**, 3-19 (1934).
- 1028 22 Mesulam, M. M. From sensation to cognition. *Brain* **121 ( Pt 6)**, 1013-1052,  
1029 doi:10.1093/brain/121.6.1013 (1998).
- 1030 23 Buckner, R. L. & Krienen, F. M. The evolution of distributed association networks in  
1031 the human brain. *Trends Cogn Sci* **17**, 648-665, doi:10.1016/j.tics.2013.09.017 (2013).
- 1032 24 Wang, P. *et al.* Inversion of a large-scale circuit model reveals a cortical hierarchy in  
1033 the dynamic resting human brain. *Sci Adv* **5**, eaat7854, doi:10.1126/sciadv.aat7854  
1034 (2019).
- 1035 25 Murphy, C. *et al.* Modes of operation: A topographic neural gradient supporting  
1036 stimulus dependent and independent cognition. *Neuroimage* **186**, 487-496,  
1037 doi:10.1016/j.neuroimage.2018.11.009 (2019).
- 1038 26 Murphy, C. *et al.* Distant from input: Evidence of regions within the default mode  
1039 network supporting perceptually-decoupled and conceptually-guided cognition.  
1040 *Neuroimage* **171**, 393-401, doi:10.1016/j.neuroimage.2018.01.017 (2018).
- 1041 27 Braak, H. *et al.* Staging of brain pathology related to sporadic Parkinson's disease.  
1042 *Neurobiol Aging* **24**, 197-211, doi:10.1016/s0197-4580(02)00065-9 (2003).
- 1043 28 Braak, H. & Braak, E. Alzheimer's disease affects limbic nuclei of the thalamus. *Acta*  
1044 *Neuropathol* **81**, 261-268, doi:10.1007/bf00305867 (1991).
- 1045 29 Hong, S. J. *et al.* Atypical functional connectome hierarchy in autism. *Nat Commun*  
1046 **10**, 1022, doi:10.1038/s41467-019-08944-1 (2019).
- 1047 30 Lerch, J. P. *et al.* Mapping anatomical correlations across cerebral cortex (MACACC)  
1048 using cortical thickness from MRI. *Neuroimage* **31**, 993-1003,  
1049 doi:10.1016/j.neuroimage.2006.01.042 (2006).
- 1050 31 Gong, G., He, Y., Chen, Z. J. & Evans, A. C. Convergence and divergence of thickness  
1051 correlations with diffusion connections across the human cerebral cortex.  
1052 *Neuroimage* **59**, 1239-1248, doi:10.1016/j.neuroimage.2011.08.017 (2012).
- 1053 32 Schmitt, J. E. *et al.* Variance decomposition of MRI-based covariance maps using  
1054 genetically informative samples and structural equation modeling. *Neuroimage* **47**,  
1055 56-64, doi:10.1016/j.neuroimage.2008.06.039 (2009).
- 1056 33 Docherty, A. R. *et al.* Genetic network properties of the human cortex based on  
1057 regional thickness and surface area measures. *Front Hum Neurosci* **9**, 440,  
1058 doi:10.3389/fnhum.2015.00440 (2015).
- 1059 34 Levin, M. Left-right asymmetry in embryonic development: a comprehensive review.  
1060 *Mech Dev* **122**, 3-25, doi:10.1016/j.mod.2004.08.006 (2005).
- 1061 35 Alexander-Bloch, A. F. *et al.* Human Cortical Thickness Organized into Genetically-  
1062 determined Communities across Spatial Resolutions. *Cereb Cortex* **29**, 106-118,  
1063 doi:10.1093/cercor/bhx309 (2019).
- 1064 36 Evans, A. C. Networks of anatomical covariance. *Neuroimage* **80**, 489-504,  
1065 doi:10.1016/j.neuroimage.2013.05.054 (2013).
- 1066 37 Alexander-Bloch, A., Giedd, J. N. & Bullmore, E. Imaging structural co-variance  
1067 between human brain regions. *Nat Rev Neurosci* **14**, 322-336, doi:10.1038/nrn3465  
1068 (2013).
- 1069 38 Romero-Garcia, R. *et al.* Structural covariance networks are coupled to expression of  
1070 genes enriched in supragranular layers of the human cortex. *Neuroimage* **171**, 256-  
1071 267, doi:10.1016/j.neuroimage.2017.12.060 (2018).

## Shaping Brain Structure

- 1072 39 Yee, Y. *et al.* Structural covariance of brain region volumes is associated with both  
1073 structural connectivity and transcriptomic similarity. *Neuroimage* **179**, 357-372,  
1074 doi:10.1016/j.neuroimage.2018.05.028 (2018).
- 1075 40 Hawrylycz, M. J. *et al.* An anatomically comprehensive atlas of the adult human brain  
1076 transcriptome. *Nature* **489**, 391-399, doi:10.1038/nature11405 (2012).
- 1077 41 Raznahan, A. *et al.* Patterns of coordinated anatomical change in human cortical  
1078 development: a longitudinal neuroimaging study of maturational coupling. *Neuron*  
1079 **72**, 873-884, doi:10.1016/j.neuron.2011.09.028 (2011).
- 1080 42 Yeo, B. T. *et al.* The organization of the human cerebral cortex estimated by intrinsic  
1081 functional connectivity. *J Neurophysiol* **106**, 1125-1165, doi:10.1152/jn.00338.2011  
1082 (2011).
- 1083 43 Milham, M. P. *et al.* An Open Resource for Non-human Primate Imaging. *Neuron* **100**,  
1084 61-74 e62, doi:10.1016/j.neuron.2018.08.039 (2018).
- 1085 44 Schaefer, A. *et al.* Local-Global Parcellation of the Human Cerebral Cortex from  
1086 Intrinsic Functional Connectivity MRI. *Cereb Cortex* **28**, 3095-3114,  
1087 doi:10.1093/cercor/bhx179 (2018).
- 1088 45 Coifman, R. R. *et al.* Geometric diffusions as a tool for harmonic analysis and  
1089 structure definition of data: diffusion maps. *Proc Natl Acad Sci U S A* **102**, 7426-7431,  
1090 doi:10.1073/pnas.0500334102 (2005).
- 1091 46 Desikan, R. S. *et al.* An automated labeling system for subdividing the human cerebral  
1092 cortex on MRI scans into gyral based regions of interest. *Neuroimage* **31**, 968-980,  
1093 doi:10.1016/j.neuroimage.2006.01.021 (2006).
- 1094 47 Glasser, M. F. *et al.* A multi-modal parcellation of human cerebral cortex. *Nature* **536**,  
1095 171-178, doi:10.1038/nature18933 (2016).
- 1096 48 Markov, N. T. *et al.* A weighted and directed interareal connectivity matrix for  
1097 macaque cerebral cortex. *Cereb Cortex* **24**, 17-36, doi:10.1093/cercor/bhs270 (2014).
- 1098 49 Xu, T. *et al.* Cross-species Functional Alignment Reveals Evolutionary Hierarchy  
1099 Within the Connectome. (bioRxiv).
- 1100 50 Pandya, D. N. & Sanides, F. Architectonic parcellation of the temporal operculum in  
1101 rhesus monkey and its projection pattern. *Z Anat Entwicklungsgesch* **139**, 127-161  
1102 (1973).
- 1103 51 Aslan, B. & Zech, G. Statistical energy as a tool for binning-free multivariate  
1104 goodness-of-fit tests, two sample comparison and unfolding. *Nuclear Instruments*  
1105 *and Methods in Physics Research Section A: Accelerators, Spectrometers, Detectors*  
1106 *and Associated Equipment* **537**, 626-636 (2005).
- 1107 52 Vos De Wael, R. *et al.* BrainSpace: a toolbox for the analysis of macroscale gradients  
1108 in neuroimaging and connectomics datasets. (biorxiv).
- 1109 53 Collins, C. E., Airey, D. C., Young, N. A., Leitch, D. B. & Kaas, J. H. Neuron densities  
1110 vary across and within cortical areas in primates. *Proc Natl Acad Sci U S A* **107**, 15927-  
1111 15932, doi:10.1073/pnas.1010356107 (2010).
- 1112 54 Charvet, C. J., Cahalane, D. J. & Finlay, B. L. Systematic, cross-cortex variation in  
1113 neuron numbers in rodents and primates. *Cereb Cortex* **25**, 147-160,  
1114 doi:10.1093/cercor/bht214 (2015).
- 1115 55 Cahalane, D. J., Charvet, C. J. & Finlay, B. L. Systematic, balancing gradients in neuron  
1116 density and number across the primate isocortex. *Front Neuroanat* **6**, 28,  
1117 doi:10.3389/fnana.2012.00028 (2012).

## Shaping Brain Structure

- 1118 56 Charvet, C. J. *et al.* Gradients in cytoarchitectural landscapes of the isocortex:  
1119 Diprotodont marsupials in comparison to eutherian mammals. *J Comp Neurol* **525**,  
1120 1811-1826, doi:10.1002/cne.24160 (2017).
- 1121 57 Charvet, C. J. & Finlay, B. L. Evo-devo and the primate isocortex: the central  
1122 organizing role of intrinsic gradients of neurogenesis. *Brain Behav Evol* **84**, 81-92,  
1123 doi:10.1159/000365181 (2014).
- 1124 58 Elston, G. N. Pyramidal cells of the frontal lobe: all the more spinous to think with. *J*  
1125 *Neurosci* **20**, RC95 (2000).
- 1126 59 Koehlin, E., Ody, C. & Kouneiher, F. The architecture of cognitive control in the  
1127 human prefrontal cortex. *Science* **302**, 1181-1185, doi:10.1126/science.1088545  
1128 (2003).
- 1129 60 Badre, D. & D'Esposito, M. Functional magnetic resonance imaging evidence for a  
1130 hierarchical organization of the prefrontal cortex. *J Cogn Neurosci* **19**, 2082-2099,  
1131 doi:10.1162/jocn.2007.19.12.2082 (2007).
- 1132 61 Bahlmann, J., Blumenfeld, R. S. & D'Esposito, M. The Rostro-Caudal Axis of Frontal  
1133 Cortex Is Sensitive to the Domain of Stimulus Information. *Cereb Cortex* **25**, 1815-  
1134 1826, doi:10.1093/cercor/bht419 (2015).
- 1135 62 Sanides, F. & Hoffmann, J. Cyto- and myeloarchitecture of the visual cortex of the cat  
1136 and of the surrounding integration cortices. *J Hirnforsch* **11**, 79-104 (1969).
- 1137 63 Pandya, D. N. & Yeterian, E. H. *Architecture and connections of cortical association*  
1138 *areas*. (Springer Science Business Media, 1985).
- 1139 64 Mishkin, M. & Ungerleider, L. G. Contribution of striate inputs to the visuospatial  
1140 functions of parieto-preoccipital cortex in monkeys. *Behav Brain Res* **6**, 57-77,  
1141 doi:10.1016/0166-4328(82)90081-x (1982).
- 1142 65 Barbas, H. & Pandya, D. N. Architecture and intrinsic connections of the prefrontal  
1143 cortex in the rhesus monkey. *J Comp Neurol* **286**, 353-375,  
1144 doi:10.1002/cne.902860306 (1989).
- 1145 66 Giaccio, R. G. The dual origin hypothesis: an evolutionary brain-behavior framework  
1146 for analyzing psychiatric disorders. *Neurosci Biobehav Rev* **30**, 526-550,  
1147 doi:10.1016/j.neubiorev.2005.04.021 (2006).
- 1148 67 Saur, D. *et al.* Ventral and dorsal pathways for language. *Proc Natl Acad Sci U S A* **105**,  
1149 18035-18040, doi:10.1073/pnas.0805234105 (2008).
- 1150 68 Goodale, M. A. & Milner, A. D. Separate visual pathways for perception and action.  
1151 *Trends Neurosci* **15**, 20-25, doi:10.1016/0166-2236(92)90344-8 (1992).
- 1152 69 Rakic, P. Neurogenesis in adult primate neocortex: an evaluation of the evidence. *Nat*  
1153 *Rev Neurosci* **3**, 65-71, doi:10.1038/nrn700 (2002).
- 1154 70 Gunz, P. *et al.* Neandertal Introgression Sheds Light on Modern Human Endocranial  
1155 Globularity. *Curr Biol* **29**, 895, doi:10.1016/j.cub.2019.02.008 (2019).
- 1156 71 Vogt, O. Die myeloarchitektonik des isocortex parietalis. *J Psychol Neurol* **18**, 379-390  
1157 (1911).
- 1158 72 Vogt, C. & Vogt, O. Allgemeinere Ergebnisse unserer Hirnforschung. *J Psychol Neurol*  
1159 **25**, 279-461.
- 1160 73 Paquola, C., Bethlehem, R. A. I. & Bernhardt, B. C. A moment of change: shifts in  
1161 myeloarchitecture characterise adolescent development of cortical gradients. *eLife*  
1162 (2020).
- 1163 74 Felleman, D. J. & Van Essen, D. C. Distributed hierarchical processing in the primate  
1164 cerebral cortex. *Cereb Cortex* **1**, 1-47, doi:10.1093/cercor/1.1.1 (1991).

## Shaping Brain Structure

- 1165 75 Beul, S. F. & Hilgetag, C. C. Towards a "canonical" agranular cortical microcircuit.  
1166 *Front Neuroanat* **8**, 165, doi:10.3389/fnana.2014.00165 (2014).
- 1167 76 Wagstyl, K. & Evans, A. BigBrain 3D atlas of cortical layers: cortical and laminar  
1168 thickness gradients diverge in sensory and motor cortices. (BioRxiv).
- 1169 77 Marcus, D. S. *et al.* Human Connectome Project informatics: quality control, database  
1170 services, and data visualization. *Neuroimage* **80**, 202-219,  
1171 doi:10.1016/j.neuroimage.2013.05.077 (2013).
- 1172 78 Glasser, M. F. *et al.* The minimal preprocessing pipelines for the Human Connectome  
1173 Project. *Neuroimage* **80**, 105-124, doi:10.1016/j.neuroimage.2013.04.127 (2013).
- 1174 79 Van Essen, D. C. *et al.* The WU-Minn Human Connectome Project: an overview.  
1175 *Neuroimage* **80**, 62-79, doi:10.1016/j.neuroimage.2013.05.041 (2013).
- 1176 80 Fischl, B. FreeSurfer. *NeuroImage* **62**, 774-781 (2013).
- 1177 81 Glahn, D. C. *et al.* Genetic control over the resting brain. *Proc Natl Acad Sci U S A* **107**,  
1178 1223-1228, doi:10.1073/pnas.0909969107 (2010).
- 1179 82 Almasy, L. & Blangero, J. Multipoint quantitative-trait linkage analysis in general  
1180 pedigrees. *Am J Hum Genet* **62**, 1198-1211, doi:10.1086/301844 (1998).
- 1181 83 Almasy, L., Dyer, T. D. & Blangero, J. Bivariate quantitative trait linkage analysis:  
1182 pleiotropy versus co-incident linkages. *Genet Epidemiol* **14**, 953-958,  
1183 doi:10.1002/(SICI)1098-2272(1997)14:6<953::AID-GEPI65>3.0.CO;2-K (1997).
- 1184 84 Zheng, D., Chen, J., Wang, X. & Zhou, Y. Genetic contribution to the phenotypic  
1185 correlation between trait impulsivity and resting-state functional connectivity of the  
1186 amygdala and its subregions. *Neuroimage* **201**, 115997,  
1187 doi:10.1016/j.neuroimage.2019.07.010 (2019).
- 1188 85 Alexander-Bloch, A. F. *et al.* On testing for spatial correspondence between maps of  
1189 human brain structure and function. *Neuroimage* **178**, 540-551,  
1190 doi:10.1016/j.neuroimage.2018.05.070 (2018).
- 1191 86 Noonan, M. P. *et al.* Separate value comparison and learning mechanisms in  
1192 macaque medial and lateral orbitofrontal cortex. *Proc Natl Acad Sci U S A* **107**, 20547-  
1193 20552, doi:10.1073/pnas.1012246107 (2010).
- 1194 87 Zuo, X. N. & Xing, X. X. Effects of non-local diffusion on structural MRI preprocessing  
1195 and default network mapping: statistical comparisons with isotropic/anisotropic  
1196 diffusion. *PLoS One* **6**, e26703, doi:10.1371/journal.pone.0026703 (2011).
- 1197 88 Yushkevich, P. A. *et al.* User-guided 3D active contour segmentation of anatomical  
1198 structures: significantly improved efficiency and reliability. *Neuroimage* **31**, 1116-  
1199 1128, doi:10.1016/j.neuroimage.2006.01.015 (2006).
- 1200 89 Fischl, B., Sereno, M. I. & Dale, A. M. Cortical surface-based analysis. II: Inflation,  
1201 flattening, and a surface-based coordinate system. *Neuroimage* **9**, 195-207,  
1202 doi:10.1006/nimg.1998.0396 (1999).
- 1203 90 Dale, A. M., Fischl, B. & Sereno, M. I. Cortical surface-based analysis. I. Segmentation  
1204 and surface reconstruction. *Neuroimage* **9**, 179-194, doi:10.1006/nimg.1998.0395  
1205 (1999).
- 1206 91 Donahue, C. J. *et al.* Using Diffusion Tractography to Predict Cortical Connection  
1207 Strength and Distance: A Quantitative Comparison with Tracers in the Monkey. *J*  
1208 *Neurosci* **36**, 6758-6770, doi:10.1523/JNEUROSCI.0493-16.2016 (2016).
- 1209 92 Wagstyl, K., Paquola, C., Bethlehem, R. A. I. & Huth, A. (2018).
- 1210 93 Waehnert, M. D. *et al.* Anatomically motivated modeling of cortical laminae.  
1211 *Neuroimage* **93 Pt 2**, 210-220, doi:10.1016/j.neuroimage.2013.03.078 (2014).

## Shaping Brain Structure

- 1212 94 Fischl, B. & Dale, A. M. Measuring the thickness of the human cerebral cortex from  
1213 magnetic resonance images. *Proc Natl Acad Sci U S A* **97**, 11050-11055,  
1214 doi:10.1073/pnas.200033797 (2000).
- 1215 95 Nooner, K. B. *et al.* The NKI-Rockland Sample: A Model for Accelerating the Pace of  
1216 Discovery Science in Psychiatry. *Front Neurosci* **6**, 152, doi:10.3389/fnins.2012.00152  
1217 (2012).
- 1218 96 Kochunov, P. *et al.* Genomic kinship construction to enhance genetic analyses in the  
1219 human connectome project data. *Hum Brain Mapp* **40**, 1677-1688,  
1220 doi:10.1002/hbm.24479 (2019).
- 1221 97 Yarkoni, T., Poldrack, R. A., Nichols, T. E., Van Essen, D. C. & Wager, T. D. Large-scale  
1222 automated synthesis of human functional neuroimaging data. *Nat Methods* **8**, 665-  
1223 670, doi:10.1038/nmeth.1635 (2011).
- 1224
